1 **Title:** Impacts of vaccination and Severe Acute Respiratory Syndrome Coronavirus 2 variants  
2 Alpha and Delta on Coronavirus Disease 2019 transmission dynamics in four metropolitan areas  
3 of the United States

4 **Running Title:** Impacts of COVID-19 vaccination and SARS-CoV-2 variants

5 **One-Sentence Summary:** Using a compartmental model parameterized to reproduce available  
6 reports of new Coronavirus Disease 2019 (COVID-19) cases, we quantified the impacts of  
7 vaccination and Severe Acute Respiratory Syndrome Coronavirus 2 (SARS-CoV-2) variants  
8 Alpha (lineage B.1.1.7) and Delta (lineage B.1.617.2) on regional epidemics in the metropolitan  
9 statistical areas (MSAs) surrounding Dallas, Houston, New York City, and Phoenix.

10 **Authors:** Abhishek Mallela<sup>1</sup>, Ye Chen<sup>1</sup>, Yen Ting Lin, Ely F. Miller, Jacob Neumann, Zhili He,  
11 Kathryn E. Nelson, Richard G. Posner, William S. Hlavacek\*

12 <sup>1</sup>These authors contributed equally.

13 Corresponding author. Email: [wish@lanl.gov](mailto:wish@lanl.gov)

14 Address for correspondence: William S. Hlavacek, Theoretical Biology and Biophysics  
15 Group, Theoretical Division, Los Alamos National Laboratory, Los Alamos, NM 87545,  
16 USA.

17 **Affiliations:** Los Alamos National Laboratory, Los Alamos, New Mexico, USA (W.S.  
18 Hlavacek, Y.T. Lin, A. Mallela); Northern Arizona University, Flagstaff, Arizona, USA (Y.  
19 Chen, Z. He, E.F. Miller, K.E. Nelson, J. Neumann, R.G. Posner).

20

21 **ABSTRACT**

22 To characterize Coronavirus Disease 2019 (COVID-19) transmission dynamics in each of  
23 the metropolitan statistical areas (MSAs) surrounding Dallas, Houston, New York City, and  
24 Phoenix in 2020 and 2021, we extended a previously reported compartmental model accounting  
25 for effects of multiple distinct periods of non-pharmaceutical interventions by adding  
26 consideration of vaccination and Severe Acute Respiratory Syndrome Coronavirus 2 (SARS-  
27 CoV-2) variants Alpha (lineage B.1.1.7) and Delta (lineage B.1.617.2). For each MSA, we found  
28 region-specific parameterizations of the model using daily reports of new COVID-19 cases  
29 available from January 21, 2020 to October 31, 2021. In the process, we obtained estimates of  
30 the relative infectiousness of Alpha and Delta as well as their takeoff times in each MSA (the  
31 times at which sustained transmission began). The estimated infectiousness of Alpha ranged  
32 from 1.1x to 1.6x that of viral strains circulating in 2020 and early 2021. The estimated relative  
33 infectiousness of Delta was higher in all cases, ranging from 1.6x to 2.2x. The estimated Alpha  
34 takeoff times ranged from February 16 (for New York City, which was evidently impacted much  
35 earlier than the other regions) to April 2, 2021. The estimated Delta takeoff times were more  
36 tightly clustered, ranging from June 15 to June 24, 2021. Estimated takeoff times are consistent  
37 with genomic surveillance data.

38

39 **Keywords:** Coronavirus Disease 2019 (COVID-19), Severe Acute Respiratory Syndrome  
40 Coronavirus 2 (SARS-CoV-2), vaccination, SARS-CoV-2 variant Alpha (lineage B.1.1.7),  
41 SARS-CoV-2 variant Delta (lineage B.1.617.2), mathematical model, Bayesian inference

42

## 43 INTRODUCTION

44 In 2020, Coronavirus Disease 2019 (COVID-19) transmission dynamics were  
45 significantly influenced by non-pharmaceutical interventions [1–7]. In 2021, other factors arose  
46 with significant impacts on disease transmission, namely, vaccination [8–9] and emergence of  
47 Severe Acute Respiratory Syndrome Coronavirus 2 (SARS-CoV-2) variants [10–11].

48 Mass vaccination in the United States (US) began on December 14, 2020 [12], with  
49 demonstrable reduction of disease burden within vaccinated populations [13]. As the vaccination  
50 campaign progressed into March 2021, there was widespread reduction in disease incidence [14]  
51 and relaxation of state-mandated non-pharmaceutical interventions [15].

52 In early 2021, SARS-CoV-2 variant Alpha (lineage B.1.1.7) spread across the US and  
53 became the dominant circulating strain [16]. By the end of July 2021, the Delta variant (lineage  
54 B.1.617.2) had supplanted Alpha [17], concomitant with increases in new COVID-19 case  
55 detection [14]. Both Alpha and Delta have been estimated to be more transmissible than strains  
56 circulating earlier [18–23], and it was determined that vaccinated persons infected with Alpha  
57 and Delta were capable of transmitting disease [24, 25].

58 In earlier work, with the aid of a compartmental model, we quantified the impact of non-  
59 pharmaceutical interventions on COVID-19 transmission dynamics [5–7]. We found that the  
60 multiple surges in disease incidence seen in 2020 [14] could be explained by changes in  
61 protective disease-avoiding behaviors, which we will refer to collectively as social distancing.  
62 Here, to quantify the impacts of vaccination and SARS-CoV-2 variants Alpha and Delta on  
63 COVID-19 transmission dynamics, we extended the model of Lin et al. [5] by adding  
64 consideration of vaccination and variants with increased transmissibility. We then found region-

65 specific parameterizations of the model using vaccination and surveillance case data available for  
66 the MSAs surrounding Dallas, Houston, New York City, and Phoenix.

## 67 **METHODS**

### 68 **Data**

69 Daily reports of new confirmed COVID-19 cases were obtained from the GitHub  
70 repository maintained by The New York Times newspaper [26]. Daily reports of newly  
71 completed vaccinations were obtained from the Covid Act Now database [27]. County-level  
72 surveillance and vaccination data were aggregated to obtain daily case and vaccination counts for  
73 the MSAs surrounding Dallas, Houston, New York City, and Phoenix. In the case of a missing  
74 daily report, we imputed the missing information as described in the Appendix.

### 75 **Compartmental Model for Disease Transmission Dynamics**

76 We used the compartmental model illustrated in Figure 1 (and Appendix Figure 1) to  
77 analyze data available for each MSA of interest. The model consists of ordinary differential  
78 equations (ODEs) describing the dynamics of 40 populations (state variables) (Appendix  
79 Equations 1–38). The state variables are each defined in Appendix Table 1. Model parameters  
80 are defined in Tables 1–3. Key features of the model are described below, and a full description  
81 of the model is provided in the Appendix.

82 We extended the model of Lin et al. [5] by including 15 new populations and 28 new  
83 transitions. The new compartments and transitions, which are highlighted in Figure 1, capture  
84 vaccination among susceptible persons, recovered persons and infected non-quarantined persons  
85 without symptoms at a time-varying *per capita* rate  $\mu(t)$ . The value of  $\mu(t)$  changes daily for

86 consistency with MSA-specific daily reports of completed vaccinations (Appendix Equation 37)  
87 from the COVID Act Now database. The model also captures immune responses to vaccination  
88 yielding varying degrees of protection and consequences of breakthrough infection of vaccinated  
89 persons. Vaccine protection against transmissible infection was taken to be variant-dependent.

90 We introduced a dimensionless step function, denoted  $Y_\theta(t)$  (Appendix Equation 38),  
91 which multiplies the disease-transmission rate constant  $\beta$  to account for  $m$  variants. In this study,  
92  $m = 2$  (see Appendix Equations 1–4, 18–22, and 24). Thus, in the new model, the quantity  
93  $Y_\theta(t)\beta$  (vs.  $\beta$  alone) characterizes disease transmissibility at time  $t$ . The step function  $Y_\theta(t)$  was  
94 initially assigned a value of  $y_0 = 1$ , and the value of  $Y_\theta(t)$  was allowed to increase at times  $t =$   
95  $\theta_1$  and  $t = \theta_2$  (Appendix Equation 38). The disease transmission rate constant of the Alpha  
96 variant was considered by introducing a step increase from  $y_0\beta \equiv 1\beta$  to  $y_1\beta$  (with  $y_1 > 1$ ) at  
97 time  $t = \theta_1$  (the Alpha takeoff time). Similarly, the disease transmission rate constant of the  
98 Delta variant was considered by introducing a step increase from  $y_1\beta$  to  $y_2\beta$  (with  $y_2 > y_1$ ) at  
99 time  $t = \theta_2 > \theta_1$  (the Delta takeoff time). We will refer to  $y_1$  and  $y_2$  as the Alpha and Delta  
100 transmissibility factors, respectively.

101 As in the original model of Lin et al. [5], the extended model accounts for a series of  $n +$   
102 1 distinct social-distancing periods (an initial period and  $n$  additional periods). Social-distancing  
103 periods are characterized by two step functions:  $P_\tau(t)$  and  $\Lambda_\tau(t)$ . The values of these functions  
104 change coordinately at a set of times  $\tau = (\sigma, \tau_1, \dots, \tau_n)$  (Appendix Equations 35 and 36), where  
105  $\sigma$  is the start time of the initial social-distancing period and  $\tau_i$  is the start time of the  $i$ th social-  
106 distancing period after the initial social-distancing period. The values of  $P_\tau(t)$  and  $\Lambda_\tau(t)$  are zero  
107 before time  $t = \sigma$ . The value of  $P_\tau(t)$  defines the steady-state setpoint fraction of the susceptible

108 population practicing social distancing at time  $t$ , and the value of  $\Lambda_\tau(t)$  defines a time scale for  
109 establishment of the steady state. The value of  $\Lambda_\tau(t)$  is an eigenvalue equal to a sum of social-  
110 distancing rate constants (5). The non-zero values of  $P_\tau(t)$  and  $\Lambda_\tau(t)$  are denoted  $p_0, \dots, p_n$  and  
111  $\lambda_0, \dots, \lambda_n$ . We assume that vaccinated persons do not practice social-distancing. Recall that we  
112 use the term “social-distancing” to refer to behaviors adopted to protect against infection. These  
113 behaviors are assumed to reduce the risk of infection by a factor  $m_b$ .

## 114 **Parameters**

115 As indicated in Tables 1 and 2, we used MSA-specific case reporting data available up to  
116 October 31, 2021 to infer MSA-specific values for parameters characterizing the start time of the  
117 local epidemic ( $t_0$ ), local disease transmissibility of ancestral viral strains ( $\beta$ ), local social-  
118 distancing dynamics ( $\sigma, \lambda_0, p_0, \tau_i, \lambda_i$  and  $p_i$ , for  $i = 1, \dots, n$ ), local emergence of variants ( $\theta_1,$   
119  $y_1, \theta_2, y_2$ ), the local rate of new case detection ( $f_D$ ), and noise in local case detection and  
120 reporting ( $r$ ). Values for other parameters were fixed (Table 3); inferences are conditioned on  
121 these fixed parameter estimates. There are 18 fixed parameters taken to be applicable for all  
122 MSAs. The total regional population  $S_0$ , which is taken to be fixed, was set on the basis of  
123 census data. The real-time *per capita* vaccination rate  $\mu(t)$ , a piecewise linear function, was set  
124 for consistency with the current empirical *per capita* rate of vaccination [27]. We adopted the  
125 fixed parameter estimates of Lin et al. [5]. New fixed parameter estimates made in this study for  
126  $m_h, f_0, f_1, f_2$ , and  $k_V$  are explained in the Appendix. The  $m_h$  parameter characterizes vaccine  
127 protection against severe disease, the  $f_0, f_1$ , and  $f_2$  parameters account for differential vaccine  
128 effectiveness against the three viral strains considered in this study (ancestral, Alpha, and Delta),  
129 and the  $k_V$  parameter characterizes the waiting time between vaccination and the acquisition of

130 vaccine-induced immunity. Our model does not account for gradual loss of immunity over time.  
131 We let  $\tilde{\mu}(t) = \mu_i$  for times  $t$  throughout the  $i$ th day after January 21, 2020 (Appendix Equation  
132 37), where  $\mu_i$  is the fraction of the local population reported to complete vaccination over the 1-d  
133 surveillance period [27]. We then defined  $\mu(t)$  as the piecewise linear interpolant to  $\tilde{\mu}(t)$ . In  
134 summary, for a given inference, the number of adjustable parameters was  $2m + 3n + 5$ , where  
135  $m$  is the number of variants under consideration ( $m = 2$  in this study) and  $n$  is the number of  
136 distinct social-distancing periods being considered beyond an initial social-distancing period.  
137 The setting for  $n$  was determined through a model-selection procedure described in the  
138 Appendix.

### 139 **Auxiliary Measurement Model**

140 We assumed that state variables of the compartmental model (Figure 1, Appendix Table  
141 1) are related to the expected number of new cases reported on a given calendar date through an  
142 auxiliary measurement model (Appendix Equations 39 and 40). The measurement model has one  
143 parameter:  $f_D$ , the region-specific fraction of new symptomatic infections detected. Thus,  $f_D \in$   
144  $[0, 1]$ . As a simplification, we considered  $f_D$  to be time-invariant. This simplification means that  
145 we assumed, for example, that case detection was neither limited nor strongly influenced by  
146 testing capacity, which varied over time. This assumption is reasonable if, for example, case  
147 detection is mainly determined by presentation for testing and, moreover, the motivations and  
148 societal factors that influence presentation remained roughly constant over the period of interest.  
149 One can also interpret  $f_D$  as the time-averaged case detection rate. The measurement-model  
150 parameter  $f_D$  was inferred jointly with the adjustable model parameters and the likelihood  
151 parameter  $r$  (see below).

## 152 **Statistical Model for Noise in Case Detection and Reporting**

153 We assumed that noise in new case detection and reporting on the  $i$ th day after January  
154 21, 2020 is captured by a negative binomial distribution  $NB(r, q_i)$  centered on  $I(t_i, t_{i+1})$ , the  
155 expected number of new cases detected over the  $i$ th day after January 21, 2020 as given by the  
156 compartmental model and the auxiliary measurement model (Appendix Equations 1–40). These  
157 and other assumptions led to the likelihood function used in inference (Appendix Equations 41–  
158 43). We determined the probability parameter  $q_i$  in  $NB(r, q_i)$  using Appendix Equation 43; the  
159 dispersion parameter  $r$  was taken to be a time-invariant adjustable parameter applicable for all  
160 days of case reporting. The likelihood parameter  $r$  was inferred jointly with the adjustable model  
161 parameters and the adjustable measurement-model parameter  $f_D$ .

## 162 **Computational Methods**

163 We determined the intervals of the step functions  $Y_\theta(t)$ ,  $P_\tau(t)$ , and  $\Lambda_\tau(t)$  (i.e.,  $\theta$  and  $\tau$ )  
164 using a model-selection procedure described in the Appendix. Simulations and Bayesian  
165 inferences were performed as previously described [5–7] and in the Appendix. Files needed to  
166 reproduce inferences using the software package PyBioNetFit [28] are available online  
167 ([https://github.com/lanl/PyBNF/tree/master/examples/Vax\\_and\\_Variants](https://github.com/lanl/PyBNF/tree/master/examples/Vax_and_Variants)). The files include case  
168 data, vaccination data, and diagnostic plots related to Bayesian inference using Markov chain  
169 Monte Carlo (MCMC) sampling. Summary diagnostics characterizing the sampling for each  
170 MSA are given in Table 4. The results of Table 4 indicate that sampling was acceptable.

## 171 **RESULTS**

172 In earlier work, we demonstrated that new COVID-19 case detection over various periods  
173 in 2020 can be faithfully reproduced for 280 (out of the 384) metropolitan statistical areas



174 (MSAs) in the US and all 50 states by region-specific parameterizations of a compartmental  
175 model that accounts for time-varying non-pharmaceutical interventions [5–7]. However, in 2021,  
176 the model lost its ability to capture disease transmission dynamics, presumably because of the  
177 impacts of vaccination and the emergence of more transmissible SARS-CoV-2 variants, namely,  
178 Alpha and Delta. To remedy this problem, we accounted for these factors in an extension of the  
179 model of Lin et al. [5] (Figure 1). Details about the model extension are provided in the  
180 Appendix. We used the new model to analyze data available for four MSAs (Figures 2–5).

181 As illustrated in Figures 2A, 3A, 4A, and 5A for the Dallas, Houston, New York City,  
182 and Phoenix MSAs respectively, the new model is able to explain surveillance case data over the  
183 period starting on January 21, 2020 and ending on October 31, 2021. The surveillance case  
184 data—daily reports of newly detected COVID-19 cases—for each of the 4 MSAs of interest  
185 largely lie within the 95% credible interval of the posterior predictive distribution for new case  
186 detection, which indicates that each regional model has explanatory power for the period of  
187 interest.

188 Each regional model (parameterized to reproduce MSA-specific case reports) provides  
189 insight into the impacts of social-distancing behaviors and the emergence of the Alpha and Delta  
190 variants; compare panel A and the corresponding panel B in Figures 2–5. For example, as can be  
191 seen in Figure 4A, the New York City MSA experienced four notable surges in disease incidence  
192 over the period of interest. Figure 4B suggests that the first surge ended because of adoption of  
193 social-distancing behaviors, the second surge occurred because of relaxation of social-distancing  
194 behaviors, the third surge was caused by Alpha, and the fourth surge was caused by Delta.  
195 Interestingly, in other MSAs, Alpha had relatively little impact on disease incidence (compare  
196 Figures 4A and 4B to Figures 2A and 2B, 3A and 3B, and 5A and 5B). This difference is partly

197 attributable to the later arrival of Alpha in the Dallas, Houston, and Phoenix MSAs in  
198 combination with the progress of mass vaccination, which is tracked locally in panel C of  
199 Figures 2–5.

200 On the basis of our region-specific parameterizations, we estimated the immune and  
201 susceptible fractions of each MSA population, as well as the fractions that achieved immunity  
202 through infection and/or vaccination (see panel C in Figures 2–5). Each of these panels shows  
203 the time evolution of five different populations in an MSA. In each MSA, only a minority of the  
204 population remained susceptible to infection (with Delta) on October 31, 2021, with a sizable  
205 fraction of the susceptible population being protected to a degree against severe disease by  
206 having completed vaccination.

207 Our inferences provide quantitative insights into the increased transmissibility of Alpha  
208 and Delta ( $y_1$  and  $y_2$ ) and their takeoff times ( $\theta_1$  and  $\theta_2$ ) in each of the 4 MSAs of interest.  
209 Figure 6 shows the marginal posteriors of  $y_1$ ,  $y_2$ ,  $\theta_1$ , and  $\theta_2$ , which were found on the basis of  
210 surveillance data for each MSA (daily case counts) reported between January 21, 2020 and  
211 October 31, 2021. Maximum *a posteriori* (MAP) estimates and 95% credible intervals for  $\theta_1$  and  
212  $\theta_2$  for each MSA are also shown in Figure 6. The MAP estimates for  $y_1$  range from 1.1 (for the  
213 Dallas MSA) to 1.6 (for the Phoenix MSA). The MAP estimates for  $y_2$  range from 1.6 (for the  
214 Dallas MSA) to 2.2 (for the New York City MSA). The MAP estimates for  $\theta_1$  range from  
215 February 16, 2021 (for the New York City MSA) to April 2, 2021 (for the Phoenix MSA). The  
216 New York City MSA was impacted much earlier than the other MSAs by Alpha. The MAP  
217 estimates for  $\theta_2$  range from June 15, 2021 (for the New York City MSA) to June 24, 2021 (for  
218 the Dallas MSA). The estimated takeoff times are consistent with regional genomic surveillance  
219 data [30], which are summarized by the shaded regions of panel A in Figures 2–5.

## 220 DISCUSSION

221 We extended a model for COVID-19 transmission dynamics that already incorporated  
222 time-varying changes in non-pharmaceutical interventions [5] to include the effects of  
223 vaccination and new variants. This model together with its region-specific parameterizations  
224 based on case data available through October 31, 2021 provide quantitative insights into the  
225 relative infectiousness of SARS-CoV-2 variants Alpha (lineage B.1.1.7) and Delta (lineage  
226 B.1.617.2). The increased transmissibility of Alpha and Delta in comparison to ancestral strains  
227 is characterized by the marginal posteriors for the transmissibility factors  $y_1$  and  $y_2$  shown in  
228 Figure 6 (panels A, C, E, and G). The maximum *a posteriori* (MAP) estimates of the  
229 transmissibility factors were similar across the four metropolitan statistical areas (MSAs) of  
230 interest (centered on Dallas, Houston, New York City, and Phoenix). The averages of our  $y_1$  and  
231  $y_2$  MAP estimates indicate that Alpha was 1.3x more infectious than ancestral strains, whereas  
232 Delta was 2.0x more infectious (corresponding to Delta being 54% more infectious than Alpha).  
233 These estimates are consistent with estimates provided in other studies [18–23]. This information  
234 combined with our earlier estimates of MSA-specific basic reproduction numbers [7] indicate  
235 that Delta is among one of the most infectious viruses known. We obtain an  $R_0$  estimate of 16 for  
236 the New York City MSA.

237 We also obtained estimates of precisely when sustained transmission of Alpha and Delta  
238 began in each of the four MSAs. The takeoff times are characterized by the marginal posteriors  
239 for  $\theta_1$  and  $\theta_2$  shown in Figure 6 (panels B, D, F, and H). The takeoff times are similar across the  
240 MSAs except that the New York City MSA was evidently impacted much earlier by Alpha: circa  
241 February 16, 2021 vs. circa late March to early April 2021 for the other MSAs. The estimated  
242 takeoff times are consistent with the observed prevalence of Alpha and Delta sequences detected

243 in regional genomic surveillance [30], as can be seen by comparing the two shaded regions in  
244 panel A of Figures 2–5 against the changes in transmissibility  $Y_\theta(t)$  depicted in the  
245 corresponding panel B of Figures 2–5. It should be noted that the case data shown in Figures 2–5  
246 are from the MSAs of interest (through aggregation of county-level data), whereas the genomic  
247 surveillance data are from larger regions.

248 Our study has notable limitations, starting with the obvious uncertainties related to model  
249 assumptions and fixed parameter estimates, which are discussed in some detail in the Appendix.  
250 For example, our model neglects gradual loss of sterilizing immunity over time and assumes a  
251 constant rate of case detection. Moreover, we caution that the inference jobs performed in this  
252 study were challenging because of the relatively high-dimensional parameter spaces involved (in  
253 comparison to typical inferences involving an ODE model-constrained likelihood function).  
254 Diagnostics indicate good sampling (Table 4,  
255 [https://github.com/lanl/PyBNF/tree/master/examples/Vax\\_and\\_Variants](https://github.com/lanl/PyBNF/tree/master/examples/Vax_and_Variants)), but we cannot be  
256 entirely certain that the samples obtained fully characterize the parameter posteriors of interest.  
257 Another concern is that the model incorporates redundant disease-incidence surge mechanisms.  
258 In the model, an increase in viral infectiousness caused by the emergence of a new variant can be  
259 mimicked, to some extent, by a relaxation of social distancing, and vice versa. For the MSAs  
260 considered here, inferred social-distancing levels were low at the time of Alpha and Delta  
261 emergence, so the inferred transmissibility factors probably reflect, at least mostly, changes in  
262 intrinsic viral infectiousness.

## 263 **ACKNOWLEDGMENTS**

264 W.S.H., Y.T.L., and A.M. were supported by the LDRD program at Los Alamos National  
265 Laboratory (project 20220268ER). Y.C., Z.H., E.F.M., J.N., K.E.N., and R.G.P. were supported  
266 by a grant from the National Institute of General Medical Sciences of the National Institutes of  
267 Health (grant R01GM111510). A.M. was supported by the 2020 Mathematical Sciences  
268 Graduate Internship program, which is sponsored by the Division of Mathematical Sciences of  
269 the National Science Foundation, and the Center for Nonlinear Studies at Los Alamos National  
270 Laboratory. Computational resources used in this study included Northern Arizona University's  
271 Monsoon computer cluster, which is funded by Arizona's Technology and Research Initiative  
272 Fund, and the FARM computer cluster at the University of California, Davis. Y.C. thanks Song  
273 Chen (University of Wisconsin, La Crosse, Wisconsin, USA) for technical assistance.

## 274 REFERENCES

- 275 [1] Courtemanche C, Garuccio J, Le A, Pinkston J, Yelowitz A. Strong social distancing  
276 measures in the United States reduced the COVID-19 growth rate. *Health Aff*  
277 (Millwood). 2020;39:1237–46. <https://doi.org/10.1377/hlthaff.2020.00608>
- 278 [2] Hsiang S, Allen D, Annan-Phan S, Bell K, Bolliger I, Chong T, et al. The effect of large-  
279 scale anti-contagion policies on the COVID-19 pandemic. *Nature*. 2020;584:262–7.  
280 <https://doi.org/10.1038/s41586-020-2404-8>
- 281 [3] Matrajt L, Leung T. Evaluating the effectiveness of social distancing interventions to  
282 delay or flatten the epidemic curve of coronavirus disease. *Emerg Infect Dis*.  
283 2020;26:1740–8. <https://doi.org/10.3201/eid2608.201093>
- 284 [4] Bo Y, Guo C, Lin C, Zeng Y, Li HB, et al. Effectiveness of non-pharmaceutical  
285 interventions on COVID-19 transmission in 190 countries from 23 January to 13 April  
286 2020. *Int J Inf Dis*. 2021;102:247–53. <https://doi.org/10.1016/j.ijid.2020.10.066>

- 287 [5] Lin YT, Neumann J, Miller EF, Posner RG, Mallela A, Safta C, Ray J, Thakur G,  
288 Chinthavali S, Hlavacek WS. Daily forecasting of regional epidemics of Coronavirus  
289 Disease with Bayesian uncertainty quantification, United States. *Emerg Infect Dis.*  
290 2021;27:767–78. <https://doi.org/10.3201/eid2703.203364>
- 291 [6] Mallela A, Neumann J, Miller EF, Chen Y, Posner RG, Lin YT, Hlavacek WS. Bayesian  
292 inference of state-level COVID-19 basic reproduction numbers across the United States,  
293 *Viruses.* 2022;14:157. <https://doi.org/10.3390/v14010157>
- 294 [7] Mallela A, Lin YT, Hlavacek WS. Differential contagiousness of respiratory disease  
295 across the United States, medRxiv. 2022. <https://doi.org/10.1101/2022.09.15.22279948>
- 296 [8] Oliver SE, Gargano JW, Marin M, Wallace M, Curran KG, Chamberland M, et al. The  
297 Advisory Committee on Immunization Practices’ interim recommendation for use of  
298 Pfizer-BioNTech COVID-19 vaccine—United States, December 2020. *MMWR Morb*  
299 *Mortal Wkly Rep.* 2020;69:1922–4. <https://doi.org/10.15585/mmwr.mm6950e2>
- 300 [9] Oliver SE, Gargano JW, Marin M, Wallace M, Curran KG, Chamberland M, et al. The  
301 Advisory Committee on Immunization Practices’ interim recommendation for use of  
302 Moderna COVID-19 vaccine—United States, December 2020. *MMWR Morb Mortal*  
303 *Wkly Rep.* 2021;69:1653–6. <https://doi.org/10.15585/mmwr.mm695152e1>
- 304 [10] Galloway SE, Paul P, MacCannell DR, Johansson MA, Brooks JT, MacNeil A, et  
305 al. Emergence of SARS-CoV-2 B.1.1.7 lineage—United States, December 29, 2020–  
306 January 12, 2021. *MMWR Morb Mortal Wkly Rep.* 2021 / 70(3);95–99.  
307 <http://dx.doi.org/10.15585/mmwr.mm7003e2>
- 308 [11] Herlihy R, Bamberg W, Burakoff A, Alden N, Severson R, Bush E, et al. Rapid  
309 increase in circulation of the SARS-CoV-2 B.1.617.2 (Delta) variant—Mesa County,

- 310 Colorado, April–June 2021. *MMWR Morb Mortal Wkly Rep.* 2021;70:1084–7.
- 311 <https://doi.org/10.15585/mmwr.mm7032e2>
- 312 [12] Department of Health and Human Services. COVID-19 Vaccine Milestones [cited  
313 2022 Dec 21] [https://www.hhs.gov/coronavirus/covid-19-](https://www.hhs.gov/coronavirus/covid-19-vaccines/distribution/index.html)  
314 [vaccines/distribution/index.html](https://www.hhs.gov/coronavirus/covid-19-vaccines/distribution/index.html)
- 315 [13] Daniel W, Nivet M, Warner J, Podolsky DK. Early evidence of the effect of  
316 SARS-CoV-2 vaccine at one medical center. *N Engl J Med.* 2021;384:1962–3.  
317 <https://doi.org/10.1056/NEJMc2102153>
- 318 [14] Centers for Disease Control and Prevention. COVID data tracker. 2021 [cited  
319 2021 Oct 6] <https://covid.cdc.gov/covid-data-tracker/#datatracker-home>
- 320 [15] Coronavirus Resource Center, Johns Hopkins University. Impact of opening and  
321 closing decisions by state: a look at how social distancing measures may have influenced  
322 trends in COVID-19 cases and deaths. 2021 [cited 2021 Oct 6]  
323 <https://coronavirus.jhu.edu/data/state-timeline>
- 324 [16] Washington NL, Gangavarapu K, Zeller M, Bolze A, Cirulli ET, Schiabor Barrett  
325 KM, et al. Emergence and rapid transmission of SARS-CoV-2 B.1.1.7 in the United  
326 States. *Cell.* 2021;184:2587–94. <https://doi.org/10.1016/j.cell.2021.03.052>
- 327 [17] Centers for Disease Control and Prevention. Covid data tracker, variant  
328 proportions. 2021 [cited 2021 Oct 6] [https://covid.cdc.gov/covid-data-tracker/#variant-](https://covid.cdc.gov/covid-data-tracker/#variant-proportions)  
329 [proportions](https://covid.cdc.gov/covid-data-tracker/#variant-proportions)
- 330 [18] Volz E, Mishra S, Chand M, Barrett JC, Johnson R, Geidelberg L, et al. Assessing  
331 transmissibility of SARS-CoV-2 lineage B.1.1.7 in England. *Nature.* 2021;593:266–9.  
332 <https://doi.org/10.1038/s41586-021-03470-x>

- 333 [19] Davies NG, Abbott S, Barnard RC, Jarvis CI, Kucharski AJ, Munday JD, et al.  
334 Estimated transmissibility and impact of SARS-CoV-2 lineage B.1.1.7 in England.  
335 Science. 2021;372:eabg3055. <https://doi.org/10.1126/science.abg3055>
- 336 [20] Ito K, Piantham C, Nishiura H. Predicted dominance of variant Delta of SARS-  
337 CoV-2 before Tokyo Olympic Games, Japan, July 2021. Euro Surveill.  
338 2021;26:2100570. <https://doi.org/10.2807/1560-7917.ES.2021.26.27.2100570>
- 339 [21] Arav Y, Fattal E, Klausner Z. Increased transmissibility of emerging SARS-CoV-  
340 2 variants is driven either by viral load or probability of infection rather than  
341 environmental stability. Mathematics. 2022, 10(19), 3422.  
342 <https://doi.org/10.3390/math10193422>
- 343 [22] Public Health England. SARS-CoV-2 variants of concern and variants under  
344 investigation in England. Technical briefing 15, June 11, 2021. [cited 2021 Aug 24]  
345 [https://assets.publishing.service.gov.uk/government/uploads/system/uploads/attachment\\_](https://assets.publishing.service.gov.uk/government/uploads/system/uploads/attachment_data/file/993879/Variants_of_Concern_VOC_Technical_Briefing_15.pdf)  
346 [data/file/993879/Variants\\_of\\_Concern\\_VOC\\_Technical\\_Briefing\\_15.pdf](https://assets.publishing.service.gov.uk/government/uploads/system/uploads/attachment_data/file/993879/Variants_of_Concern_VOC_Technical_Briefing_15.pdf)
- 347 [23] Cascella M, Rajnik M, Aleem A, Dulebohn SC, Di Napoli R. Features,  
348 evaluation, and treatment of coronavirus (COVID-19). July 30, 2021 update. Treasure  
349 Island (FL): StatPearls Publishing; 2022.  
350 <https://www.ncbi.nlm.nih.gov/books/NBK554776/>
- 351 [24] Lopez Bernal J, Andrews N, Gower C, Gallagher E, Simmons R, Thelwall S, et  
352 al. Effectiveness of Covid-19 Vaccines against the B.1.617.2 (Delta) variant. N Engl J  
353 Med. 2021;385:585–94. <https://doi.org/10.1056/NEJMoa2108891>
- 354 [25] Rovida F, Cassaniti I, Paolucci S, Percivalle E, Sarasini A, Piralla A, et al. SARS-  
355 CoV-2 vaccine breakthrough infections with the alpha variant are asymptomatic or



- 356 mildly symptomatic among health care workers. Nat Commun. 2021;12:6032.
- 357 <https://doi.org/10.1038/s41467-021-26154-6>
- 358 [26] The New York Times. Coronavirus (Covid-19) data in the United States. 2021
- 359 [cited 2021 Aug 24] <https://github.com/nytimes/covid-19-data>
- 360 [27] Covid Act Now. US COVID risk and vaccine tracker. 2021 [cited 2021 Sep 29]
- 361 <https://covidactnow.org/>
- 362 [28] Neumann J, Lin YT, Mallela A, Miller EF, Colvin J, Duprat AT, Chen Y,
- 363 Hlavacek WS, Posner RG. Implementation of a practical Markov chain Monte Carlo
- 364 sampling algorithm in PyBioNetFit. Bioinformatics. 2022;38:1770–2.
- 365 <https://doi.org/10.1093/bioinformatics/btac004>
- 366 [29] Vats D, Knudson C. Revisiting the Gelman-Rubin Diagnostic. Statist. Sci.
- 367 2021;36:518–529. <https://doi.org/10.1214/20-STS812>
- 368 [30] Centers for Disease Control and Prevention. SARS-CoV-2 Variant Proportions.
- 369 2023 [cited 2023 Mar 8] [https://data.cdc.gov/Laboratory-Surveillance/SARS-CoV-2-](https://data.cdc.gov/Laboratory-Surveillance/SARS-CoV-2-Variant-Proportions/jr58-6ygp)
- 370 [Variant-Proportions/jr58-6ygp](https://data.cdc.gov/Laboratory-Surveillance/SARS-CoV-2-Variant-Proportions/jr58-6ygp)
- 371

372 **Table 1.** Model parameter values inferred for the Dallas, Houston, New York City, and Phoenix  
 373 Metropolitan Statistical Areas (MSAs) on October 31, 2021

| Parameter   | MAP estimate*<br>for Dallas<br>(Units) | MAP estimate*<br>for Houston<br>(Units) | MAP estimate* for<br>New York City<br>(Units) | MAP estimate*<br>for Phoenix<br>(Units) |
|-------------|----------------------------------------|-----------------------------------------|-----------------------------------------------|-----------------------------------------|
| $t_0$       | 12.0 (d)                               | 11.7 (d)                                | 8.6 (d)                                       | 15.0 (d)                                |
| $\beta$     | 0.29 (d <sup>-1</sup> )                | 0.29 (d <sup>-1</sup> )                 | 0.37 (d <sup>-1</sup> )                       | 0.28 (d <sup>-1</sup> )                 |
| $\sigma$    | 57 (d)                                 | 58 (d)                                  | 60 (d)                                        | 56 (d)                                  |
| $p_0$       | 0.31                                   | 0.32                                    | 0.48                                          | 0.32                                    |
| $\lambda_0$ | 6.8 (d <sup>-1</sup> )                 | 6.8 (d <sup>-1</sup> )                  | 10.0 (d <sup>-1</sup> )                       | 8.5 (d <sup>-1</sup> )                  |
| $\tau_1$    | 62 (d)                                 | 61 (d)                                  | 64 (d)                                        | 40 (d)                                  |
| $p_1$       | 0.26                                   | 0.26                                    | 0.41                                          | 0.20                                    |
| $\lambda_1$ | 2.2 (d <sup>-1</sup> )                 | 2.4 (d <sup>-1</sup> )                  | 3.1 (d <sup>-1</sup> )                        | 1.5 (d <sup>-1</sup> )                  |
| $\tau_2$    | 46 (d)                                 | 52 (d)                                  | 29 (d)                                        | 51 (d)                                  |
| $p_2$       | 0.34                                   | 0.32                                    | 0.42                                          | 0.36                                    |
| $\lambda_2$ | 2.0 (d <sup>-1</sup> )                 | 2.8 (d <sup>-1</sup> )                  | 0.34 (d <sup>-1</sup> )                       | 3.1 (d <sup>-1</sup> )                  |
| $\tau_3$    | 83 (d)                                 | 99 (d)                                  | 76 (d)                                        | 79 (d)                                  |
| $p_3$       | 0.19                                   | 0.18                                    | 0.30                                          | 0.19                                    |
| $\lambda_3$ | 2.4 (d <sup>-1</sup> )                 | 2.5 (d <sup>-1</sup> )                  | 8.3 (d <sup>-1</sup> )                        | 1.6 (d <sup>-1</sup> )                  |
| $\tau_4$    | 131 (d)                                | -                                       | -                                             | 213 (d)                                 |
| $p_4$       | 0.10                                   | -                                       | -                                             | 0.19                                    |
| $\lambda_4$ | 1.6 (d <sup>-1</sup> )                 | -                                       | -                                             | 2.0 (d <sup>-1</sup> )                  |

|            |         |         |         |         |
|------------|---------|---------|---------|---------|
| $\theta_1$ | 427 (d) | 434 (d) | 392 (d) | 437 (d) |
| $y_1$      | 1.1     | 1.2     | 1.3     | 1.6     |
| $\theta_2$ | 92 (d)  | 83 (d)  | 120 (d) | 80 (d)  |
| $y_2$      | 1.6     | 1.8     | 2.2     | 2.2     |
| $f_D$      | 0.37    | 0.32    | 0.39    | 0.53    |
| $r$        | 3.2     | 2.8     | 9.4     | 3.4     |

374 \*Maximum *a posteriori* (MAP) estimates are region-specific and inference-time-dependent.  
375 Here, inference was based on MSA-specific confirmed coronavirus disease case count data  
376 available in the GitHub repository maintained by *The New York Times* newspaper [26] for  
377 January 21, 2020 to October 31, 2021. Time  $t = 0$  corresponds to midnight on January 21, 2020.  
378 Inferences were conditioned on the compartmental model of Appendix Equations 1–38,  
379 consideration of two viral variants (Alpha and Delta,  $m = 2$ ), and  $n + 1$  distinct social-  
380 distancing periods in total ( $n = 4$  for Dallas and Phoenix;  $n = 3$  for New York City and  
381 Houston), the fixed parameter estimates of Table 3, and the initial condition  $I_0$  and  $S_0$  at time  $t =$   
382  $t_0$  given in Table 3. The choice of two variants and the setting for  $n$  were chosen through a  
383 model-selection procedure described in the Appendix. With  $m = 2$  and  $n = 3$ , there are 18  
384 adjustable model parameters:  $t_0, \beta, \theta_1, y_1, \theta_2, y_2, \sigma, p_0, \lambda_0, \tau_1, p_1, \lambda_1, \tau_2, p_2, \lambda_2, \tau_3, p_3,$  and  $\lambda_3$ .  
385 With  $m = 2$  and  $n = 4$ , there are 21 adjustable model parameters:  $t_0, \beta, \theta_1, y_1, \theta_2, y_2, \sigma, p_0, \lambda_0,$   
386  $\tau_1, p_1, \lambda_1, \tau_2, p_2, \lambda_2, \tau_3, p_3, \lambda_3, \tau_4, p_4,$  and  $\lambda_4$ . These parameters were jointly inferred together  
387 with  $f_D$ , the parameter of the measurement model (i.e., the fraction of new cases detected and  
388 reported) (Appendix Equation 40), and  $r$ , the dispersion parameter of the statistical model for  
389 noise in case detection and reporting (i.e., the adjustable parameter of the negative binomial

390 likelihood function) (Appendix Equations 41–43). We assumed a uniform proper prior, as  
391 described in the Appendix.

392

393

394 **Table 2.** Descriptions of MSA-specific adjustable model parameters.

| Parameter   | Description                                                        |
|-------------|--------------------------------------------------------------------|
| $t_0$       | Start of local disease transmission                                |
| $\beta$     | Rate constant for disease transmission                             |
| $\sigma$    | Start of first social-distancing period                            |
| $p_0$       | Social-distancing setpoint for the period $t \in [\sigma, \tau_1)$ |
| $\lambda_0$ | Social-distancing eigenvalue paired with $p_0$                     |
| $\tau_1$    | Start of second social-distancing period                           |
| $p_1$       | Social-distancing setpoint for the period $t \in [\tau_1, \tau_2)$ |
| $\lambda_1$ | Social-distancing eigenvalue paired with $p_1$                     |
| $\tau_2$    | Start of third social-distancing period                            |
| $p_2$       | Social-distancing setpoint for the period $t \in [\tau_2, \tau_3)$ |
| $\lambda_2$ | Social-distancing eigenvalue paired with $p_2$                     |
| $\tau_3$    | Start of fourth social-distancing period                           |
| $p_3$       | Social-distancing setpoint for the period $t \in [\tau_3, \tau_4)$ |
| $\lambda_3$ | Social-distancing eigenvalue paired with $p_3$                     |
| $\tau_4$    | Start of fifth social-distancing period                            |
| $p_4$       | Social-distancing setpoint for the period $t \in [\tau_4, \infty)$ |
| $\lambda_4$ | Social-distancing eigenvalue paired with $p_4$                     |
| $\theta_1$  | Alpha takeoff time                                                 |
| $\gamma_1$  | Increased infectiousness of Alpha (relative to ancestral strains)  |

|            |                                                                   |
|------------|-------------------------------------------------------------------|
| $\theta_2$ | Delta takeoff time                                                |
| $y_2$      | Increased infectiousness of Delta (relative to ancestral strains) |
| $f_D$      | Fraction of cases detected and reported                           |
| $r$        | Dispersion parameter of NB( $r, q_i$ )*                           |

---

395 \*The probability parameter of NB( $r, q_i$ ) is constrained, i.e., the value of  $q_i$ , which is reporting  
396 time-dependent, is given by Appendix Equation 43.

397

398

399

400

401

402

403

404

405

406

407

408

409

410

411

412

413 **Table 3.** Fixed parameter estimates for each region-specific compartmental model

| Parameter   | Estimate <sup>1</sup><br>(Units)                            | Description                                                                                                                                       | Source                  |
|-------------|-------------------------------------------------------------|---------------------------------------------------------------------------------------------------------------------------------------------------|-------------------------|
| $I_0$       | 1                                                           | Number of infectious persons at time $t = t_0$                                                                                                    | [5]                     |
| $S_0$       | 19,216,182 <sup>2</sup>                                     | Total population                                                                                                                                  | [5]                     |
| $\mu(t)$    | Empirical<br>time-series <sup>3</sup><br>(d <sup>-1</sup> ) | Daily <i>per capita</i> rate of vaccination                                                                                                       | [27]                    |
| $m_b$       | 0.1                                                         | Reduction in risk of infection because of social distancing                                                                                       | [5]                     |
| $m_h$       | 0.04                                                        | Reduction in risk of severe disease (once symptomatic) because of vaccination                                                                     | This study <sup>4</sup> |
| $f_A$       | 0.44                                                        | Fraction of all cases that are asymptomatic                                                                                                       | [5]                     |
| $f_H$       | 0.054                                                       | Fraction of symptomatic cases that are severe (in the absence of vaccination)                                                                     | [5]                     |
| $f_R$       | 0.79                                                        | Fraction of persons with severe disease who recover                                                                                               | [5]                     |
| $1 - f_0$   | 0.1                                                         | Fraction of vaccinated persons who fail to develop an immune response that protects against productive infection by ancestral strains or variants | This study <sup>4</sup> |
| $f_0 - f_1$ | 0.09                                                        | Fraction of vaccinated persons who develop an immune response that protects against                                                               | This study <sup>4</sup> |

|             |                           |                                                                                                                                                                                 |                         |
|-------------|---------------------------|---------------------------------------------------------------------------------------------------------------------------------------------------------------------------------|-------------------------|
|             |                           | productive infection by ancestral strains (but not the Alpha or Delta variant)                                                                                                  |                         |
| $f_1 - f_2$ | 0.12                      | Fraction of vaccinated persons who develop an immune response that protects against productive infection by ancestral strains and the Alpha variant (but not the Delta variant) | This study <sup>4</sup> |
| $f_2$       | 0.69                      | Fraction of vaccinated persons who develop an immune response that protects against productive infection by ancestral strains and the Alpha and Delta variants                  | This study <sup>4</sup> |
| $\rho_E$    | 1.1                       | Relative infectiousness of persons without symptoms in the incubation period of infection                                                                                       | [5]                     |
| $\rho_A$    | 0.9                       | Relative infectiousness of persons without symptoms in the immune-clearance phase of infection                                                                                  | [5]                     |
| $k_L$       | 0.94 (d <sup>-1</sup> )   | Rate constant for progression through each stage of the incubation period of infection <sup>5</sup>                                                                             | [5]                     |
| $k_Q$       | 0.0038 (d <sup>-1</sup> ) | Rate constant for quarantine of infected, non-vaccinated persons                                                                                                                | [5]                     |
| $j_Q$       | 0.4 (d <sup>-1</sup> )    | Rate constant for self-isolation of symptomatic, non-vaccinated persons                                                                                                         | [5]                     |



|       |                         |                                                                                                                                                   |                         |
|-------|-------------------------|---------------------------------------------------------------------------------------------------------------------------------------------------|-------------------------|
| $c_A$ | 0.26 (d <sup>-1</sup> ) | Rate constant for completion of the immune clearance phase of infection for persons without symptoms                                              | [5]                     |
| $c_I$ | 0.12 (d <sup>-1</sup> ) | Rate constant for completion of the immune clearance phase of infection or progression to severe disease for non-vaccinated persons with symptoms | [5]                     |
| $c_H$ | 0.17 (d <sup>-1</sup> ) | Rate constant for recovery or progression to death for non-vaccinated persons with severe disease                                                 | [5]                     |
| $k_V$ | 0.3 (d <sup>-1</sup> )  | Rate constant for progression through each stage of immune response to vaccination <sup>6</sup>                                                   | This study <sup>4</sup> |

---

414 <sup>1</sup>Fixed parameter estimates are based on information external to the surveillance data used to  
415 infer the adjustable parameter values of Table 1. Estimates are applicable to all metropolitan  
416 statistical areas (MSAs) of interest except for  $S_0$  and the vaccination function  $\mu(t)$ , which are  
417 region-specific. Recall that  $\mu(t)$  is updated daily for consistency with vaccination data.

418 <sup>2</sup>The total population  $S_0$  is MSA-specific. Here,  $S_0$  is given for the New York City MSA. The  
419 initial susceptible population is taken to be the total population. We used  $S_0 = 7,573,136$ ,  
420 7,066,141, and 4,873,019 for the Dallas, Houston, and Phoenix MSAs, respectively.

421 <sup>3</sup>The function  $\mu(t)$  is determined by region-specific vaccination data [27].

422 <sup>4</sup>See the Appendix for more information  
423 <sup>5</sup>See the Appendix for more information about estimates of fixed parameter values made in this  
study.

424 <sup>5</sup>As in the study of Lin et al. [5], the incubation period is divided into 5 stages (Figure 1), each of  
425 equal duration on average.

426 <sup>6</sup>The immune response to vaccination is divided into 6 stages (Figure 1), each of equal duration  
427 on average. The choice of 6 stages is justified in the Appendix and Appendix Figure 2.

428

429 **Table 4.** Multivariate potential scale reduction factors (PSRFs) and multivariate effective sample  
430 sizes (ESSs) corresponding to the stable Gelman-Rubin statistic for Markov chains generated  
431 using PyBioNetFit for the Dallas, Houston, New York City, and Phoenix Metropolitan Statistical  
432 Areas (MSAs)

| MSA           | Multivariate<br>PSRF <sup>1</sup> | Multivariate<br>ESS <sup>1</sup> |
|---------------|-----------------------------------|----------------------------------|
| Dallas        | 1.0016                            | 317.2                            |
| Houston       | 1.0021                            | 239.9                            |
| New York City | 1.0022                            | 225.9                            |
| Phoenix       | 1.0034                            | 146.2                            |

433 <sup>1</sup>Computed using the methodology of Vats and Knudson [29].

434

435

436

437

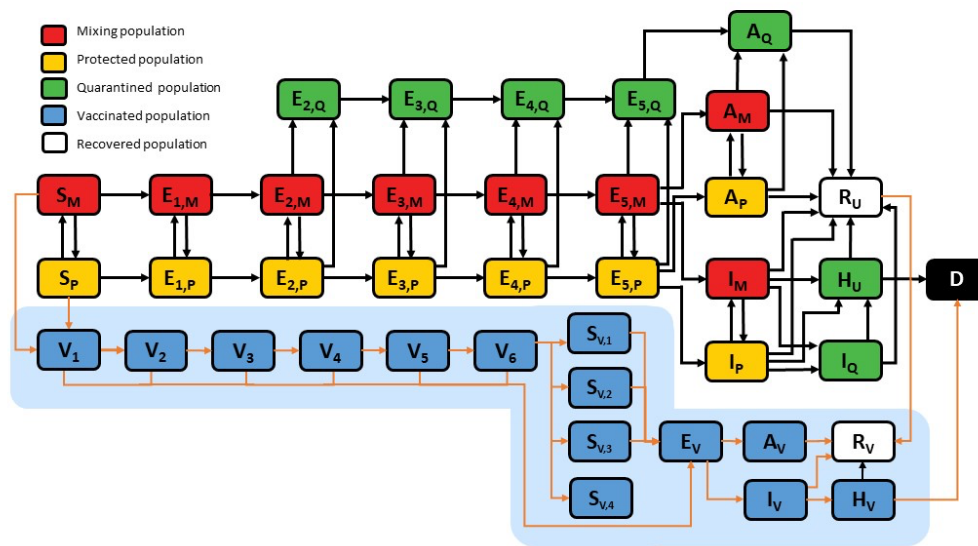

438

439 **Figure 1.** Illustration of compartmental model. The independent variable of the model is time  $t$ .

440 The 40 dependent state variables of the model are populations, which are represented as boxes

441 with rounded corners. A description of each state variable is given in Appendix Table 1. The 15

442 highlighted boxes (on the blue background) represent state variables introduced to capture the

443 effects of vaccination and the Alpha and Delta variants. The other 25 boxes represent state

444 variables considered in the model of Lin et al. [5]. Arrows connecting boxes represent

445 transitions. Each transition represents the movement of persons from one population to another.

446 The arrows highlighted in orange represent transitions introduced to capture the effects of

447 vaccination and the Alpha and Delta variants. Other arrows represent transitions considered in

448 the model of Lin et al. [5]. Each arrow is associated with one or more parameters that

449 characterize a rate of movement; these parameters are not shown here but are shown in Appendix

450 Figure 1. A full description of the model is given in the Appendix. Briefly, new parts of the

451 model can be described as follows. Vaccination is modeled by moving susceptible persons (in

452 the  $S_M$  and  $S_P$  populations) into the  $V_1$  population. Another consequence of vaccination is the  
453 movement of recovered unvaccinated persons (in the  $R_U$  population) into the  $R_V$  population. The  
454 rate of vaccination typically changes from day to day to match the empirical daily rate of  
455 vaccination. Recovered and susceptible persons have the same *per-capita* probability of  
456 vaccination. Persons in  $S_M$  are mixing (i.e., not practicing social distancing) and persons in  $S_P$   
457 are practicing social distancing (and thereby protected from infection to a degree). The series of  
458 transitions involving the populations  $V_1, \dots, V_6$  was introduced to model the immune response to  
459 vaccination (i.e., the amount of time required for vaccination to induce neutralizing antibodies).  
460 With this approach, the time from vaccination to appearance of neutralizing antibodies is a  
461 random variable characterized by an Erlang distribution. Persons in  $V_1, \dots, V_6$  may be infected.  
462 Persons in  $V_6$  transition to one of the following four populations:  $S_{V,1}, \dots, S_{V,4}$ . These populations  
463 represent persons with varying degrees of immune protection. Persons in  $S_{V,1}$  are not protected  
464 against productive infection (i.e., an infection that can be transmitted to others) by any viral  
465 strain. Persons in  $S_{V,2}$  are protected against productive infection by viral strains present before  
466 the emergence of Alpha but not Alpha or Delta. Persons in  $S_{V,3}$  are protected against productive  
467 infection by viral strains present before the emergence of Alpha and also Alpha but not Delta.  
468 Persons in  $S_{V,4}$  are protected against productive infection by all of the viral strains considered up  
469 to October 31, 2021. Vaccinated persons who become infected move into  $E_V$ . The time spent in  
470  $E_V$  corresponds to the length of the incubation period for vaccinated persons. The mean duration  
471 of the incubation period is taken to be the same for vaccinated and unvaccinated persons;  
472 however, as a simplification, for vaccinated persons, the time spent in the incubation period is  
473 taken to consist of a single stage and consequently is exponentially distributed (vs. Erlang  
474 distributed for unvaccinated persons). All non-quarantined exposed persons (in populations  $E_V$

475 and  $E_{i,M}$  and  $E_{i,P}$  for  $i = 1, \dots, 5$ ) are taken to be infectious. Persons exiting  $E_V$  leave the  
476 incubation period and enter the immune clearance phase of infection, during which they may be  
477 asymptomatic ( $A_V$ ) or symptomatic with mild disease ( $I_V$ ). All non-quarantined asymptomatic  
478 persons (in populations  $A_V$ ,  $A_M$ , and  $A_P$ ) are taken to be infectious. Persons in  $A_V$  are all assumed  
479 to eventually recover (i.e., to enter  $R_V$ ). Persons with mild symptomatic disease may recover  
480 (i.e., enter  $R_V$ ) or experience severe disease, at which point they move to  $H_V$  (in hospital or  
481 isolated at home). Vaccinated persons have a diminished probability of severe disease in  
482 comparison to unvaccinated persons. Persons in  $H_V$  either recover (move to  $R_V$ ) or die from  
483 COVID-19 complications (move to  $D$ ). For a person with severe disease, the probability of death  
484 is independent of vaccination status. We assume that vaccinated persons do not participate in  
485 social distancing, quarantine, or self-isolation driven by symptom awareness.

486  
487

A

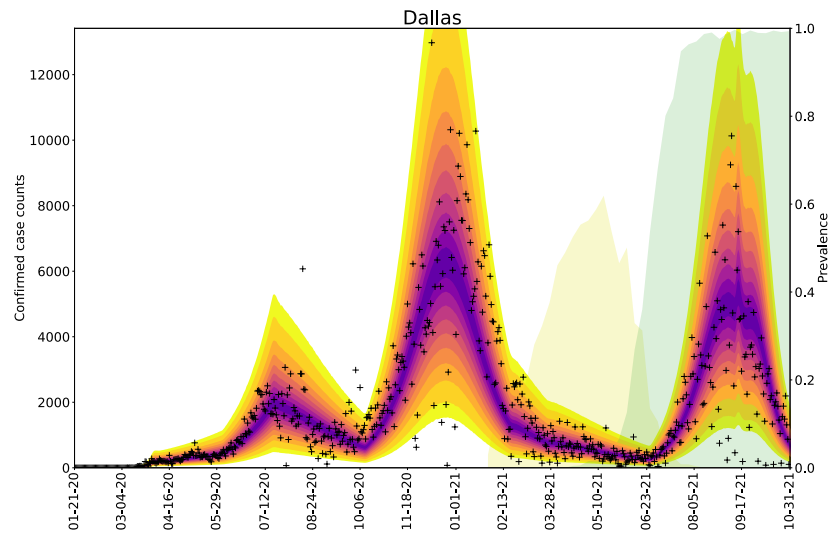

B

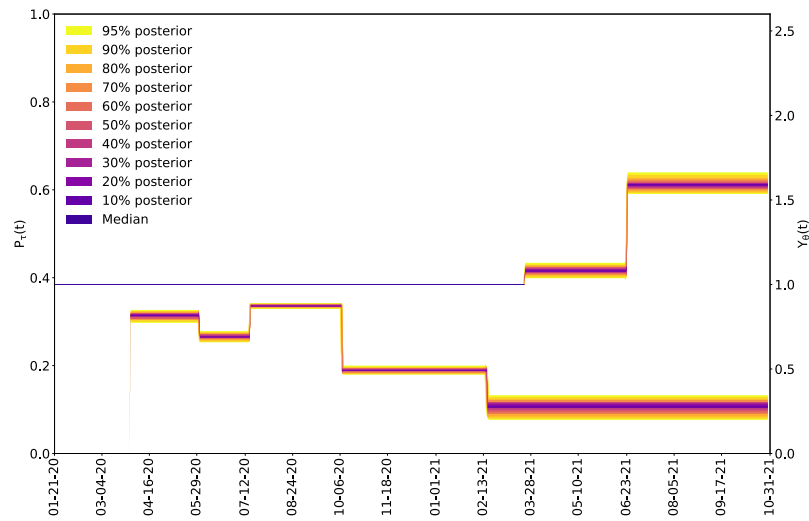

C

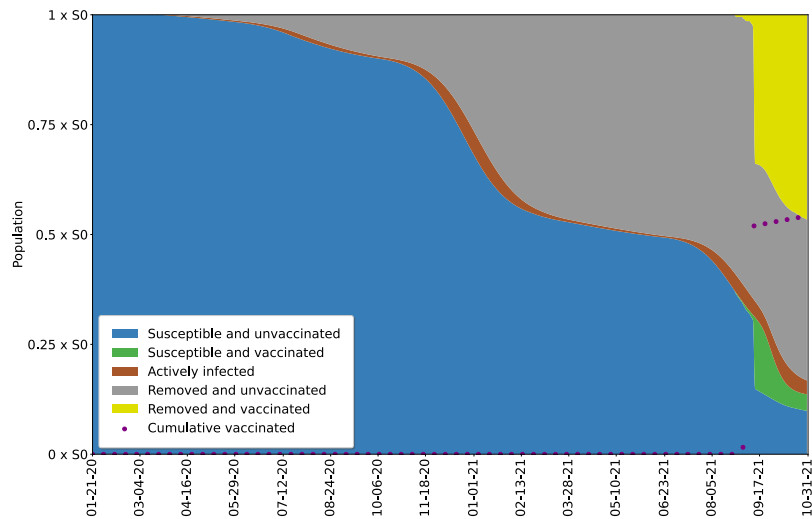

489 **Figure 2.** Inference results obtained for the MSA surrounding Dallas using regional surveillance  
490 data—daily reports of new COVID-19 cases—available for January 21, 2020 to October 31,  
491 2021. A) Credible intervals of the time-dependent posterior predictive distribution for detected  
492 and reported new cases are shown. The color bands from bottom to top indicate the 5%, 10%, ...  
493 90%, 95% credible intervals. This colored region all together indicates the 95% credible interval  
494 and can be expected to cover approximately 95% of the data. Empirical case reports are indicated  
495 by black symbols. A case count of 12,974 cases on December 11, 2020 is not shown in the plot.  
496 Alpha prevalence is indicated with a shaded light-yellow background. Delta prevalence is  
497 indicated with a shaded light-green background. B) The social-distancing stationary setpoint is  
498 given by  $P_\tau(t)$  and the variant transmissibility factor is given by  $Y_\theta(t)$ . Note that the values of  
499  $P_\tau(t)$  and  $Y_\theta(t)$  are dimensionless. Credible intervals corresponding to 1000 samples from the  
500 time-dependent posterior predictive distributions are shown for  $P_\tau(t)$  and  $Y_\theta(t)$ . The curve  
501 corresponding to  $Y_\theta(t)$  is monotonically increasing with an initial value of 1. The curve  
502 corresponding to  $P_\tau(t)$  is decreasing from left to right after the start of social distancing. C)  
503 Inferred changes in the distribution of persons amongst five selected subpopulations over the  
504 course of the local COVID-19 epidemic. The five populations sum to a constant,  $S_0$ , the total  
505 population. Results shown here are based on the parameter values given in Tables 1 and 3. The  
506 five populations are defined as follows: the population of susceptible unvaccinated persons (blue  
507 area) is given by  $S_M + S_P$ , the population of susceptible vaccinated persons (green area) is given  
508 by  $\sum_{i=1}^6 V_i + S_{V,1} + U_{\theta_1}(t)S_{V,2} + U_{\theta_2}(t)S_{V,3}$ , the population of actively infected persons (orange  
509 area) is given by  $H_U + H_V + E_V + \sum_{i=1}^5 (E_{i,M} + E_{i,P} + E_{i,Q}) + \sum_{x \in \{M,P,Q,V\}} (A_x + I_x)$ , the  
510 population of removed unvaccinated persons (gray area) is given by  $R_U + D$ , and the population  
511 of removed vaccinated persons (yellow area) is given by  $R_V + (1 - U_{\theta_1}(t))S_{V,2} +$



512  $(1 - U_{\theta_2}(t))S_{V,3} + S_{V,4}$ . Except for  $U_{\theta_1}(t)$  and  $U_{\theta_2}(t)$ , the terms in the above definitions refer to  
513 state variables of the compartmental model of Figure 1 and Appendix Figure 1, which are  
514 defined in Appendix Table 1.  $U_{\theta_1}(t)$  and  $U_{\theta_2}(t)$  are unit step functions (Appendix Equation 33  
515 and 34), which change value from 0 to 1 at time  $t = \theta_1$  and  $t = \theta_2$ , respectively. Recall that  $\theta_1$   
516 and  $\theta_2$  are the Alpha and Delta takeoff times. The sum  $\sum_i(\mu_i \times 1 \text{ d})$  (purple dots), which is the  
517 empirical cumulative number of completed vaccinations, is shown as a function of time  $t$ .  
518

A

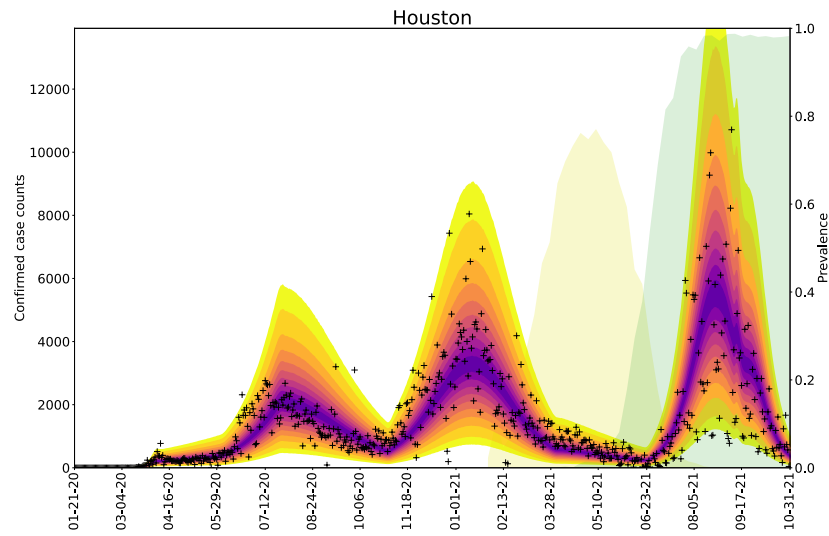

B

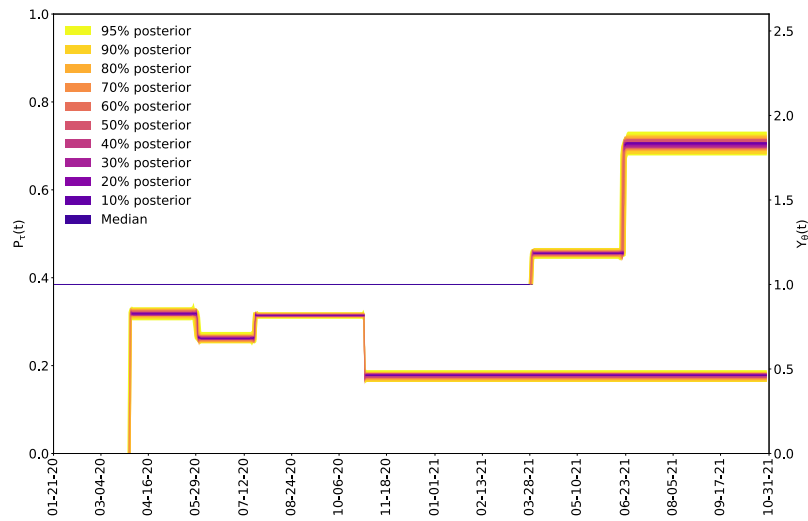

C

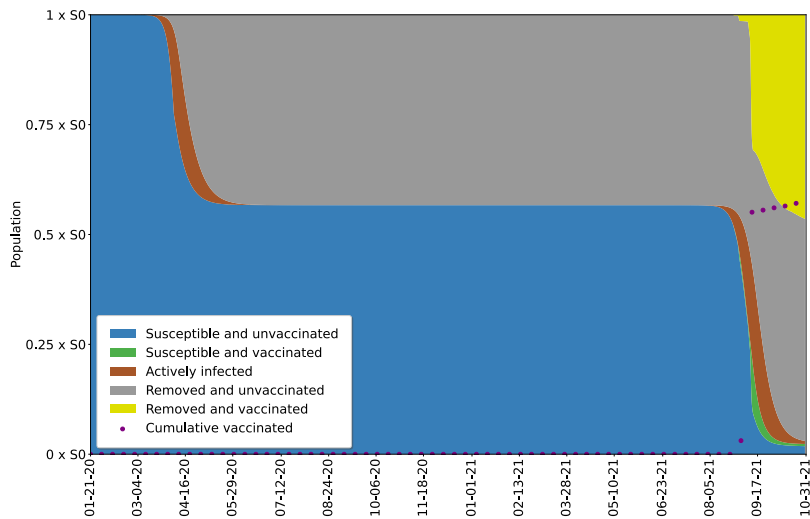

520 **Figure 3.** Inference results obtained for the MSA surrounding Houston using regional  
521 surveillance data—daily reports of new COVID-19 cases—available for January 21, 2020 to  
522 October 31, 2021. It should be noted that four anomalous (negative) empirical case counts are  
523 not shown in the plot. A case count of 14,300 cases on September 21, 2020 is not shown in the  
524 plot. See the caption of Figure 2 for additional information.

525

A

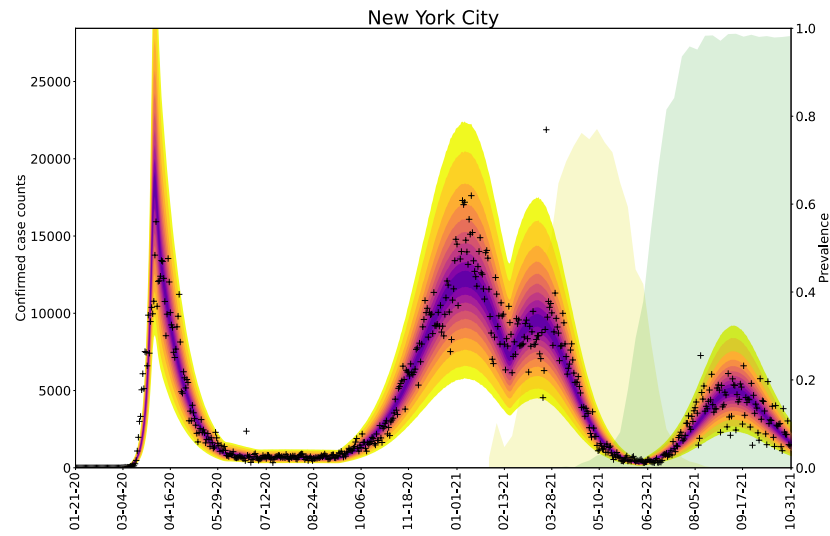

B

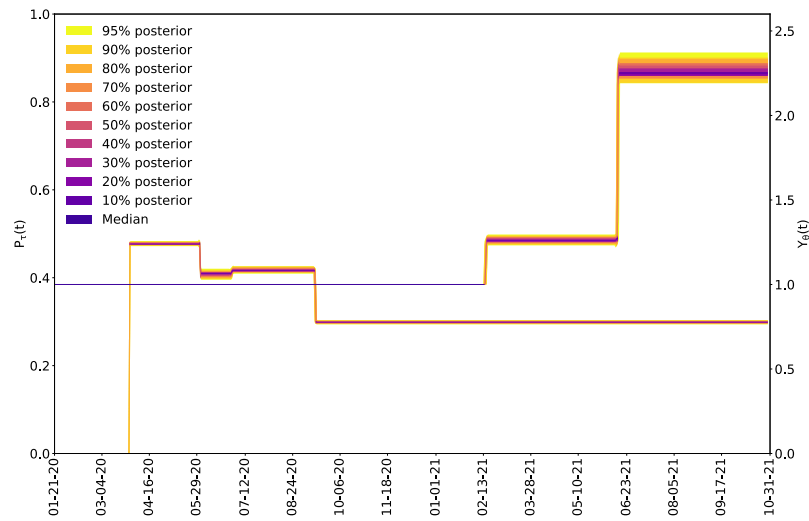

C

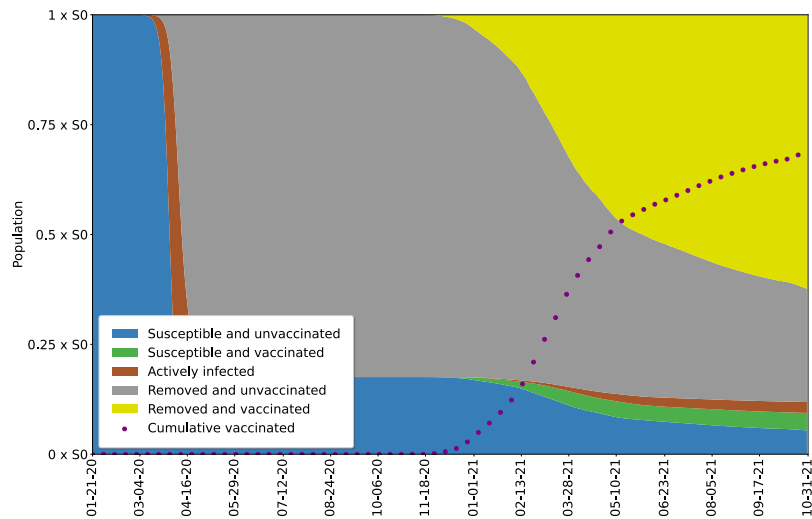

527 **Figure 4.** Inference results obtained for the MSA surrounding New York City using regional  
528 surveillance data—daily reports of new COVID-19 cases—available for January 21, 2020 to  
529 October 31, 2021. It should be noted that a single anomalous (negative) empirical case count is  
530 not shown in the plot. A case count of 42,774 cases on January 3, 2021 is not shown in the plot.  
531 See the caption of Figure 2 for additional information.

532

533

534

535

536

537

538

539

540

A

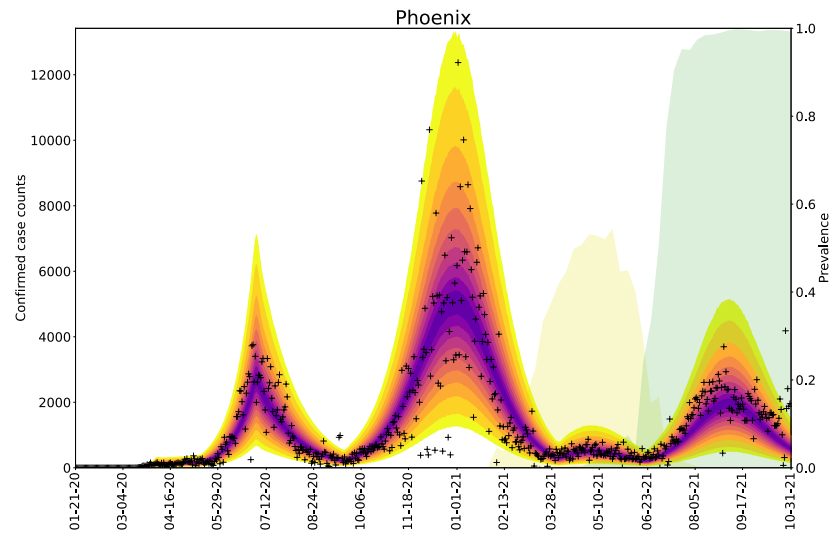

B

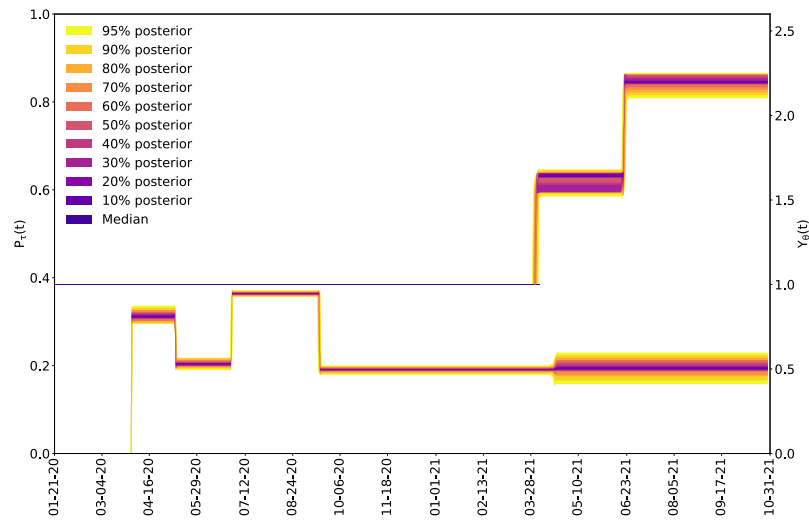

C

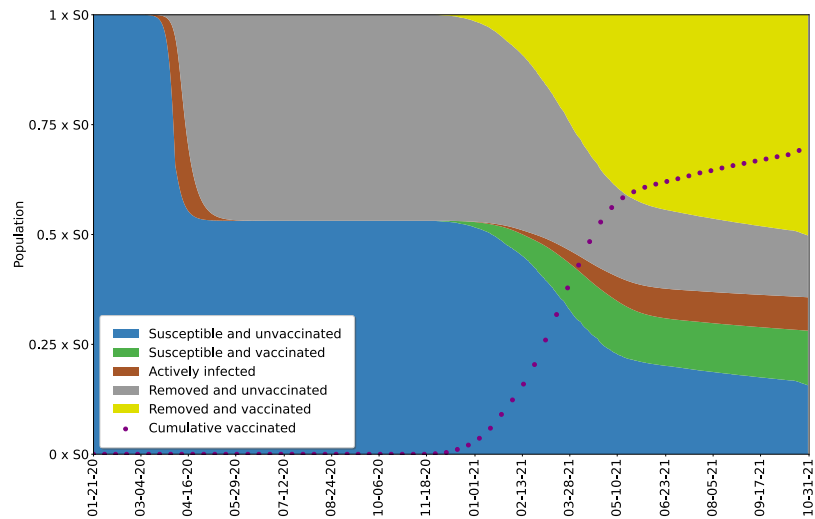

542 **Figure 5.** Inference results obtained for the MSA surrounding Phoenix using regional  
543 surveillance data—daily reports of new COVID-19 cases—available for January 21, 2020 to  
544 October 31, 2021. It should be noted that two anomalous (negative) empirical case counts are not  
545 shown in the plot. A case count of 12,372 cases on January 3, 2021 is not shown in the plot. See  
546 the caption of Figure 2 for additional information.

547

548

549

550

551

552

553

554

555

556

557

558

559

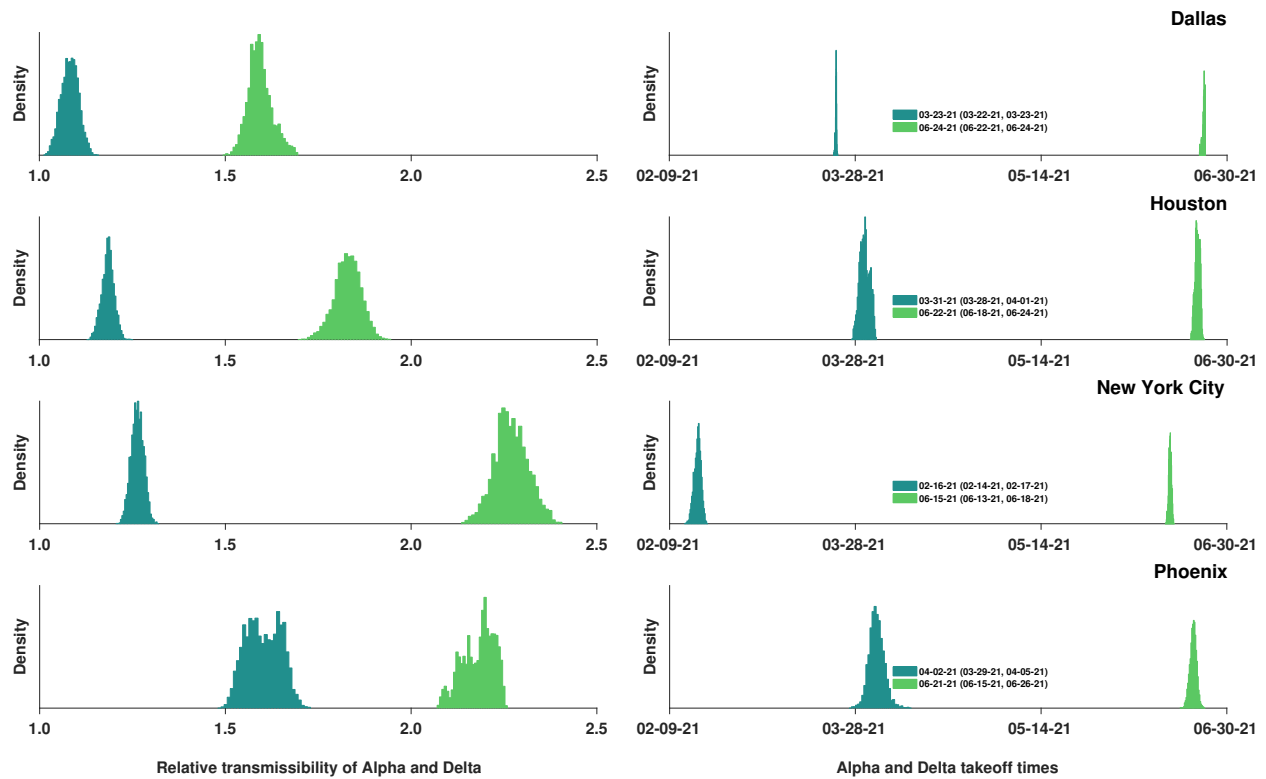

560

561 **Figure 6.** Marginal posterior distributions of transmissibility factors for Alpha in dark-green and  
562 Delta in light-green (left panels) and takeoff times for Alpha and Delta (right panels) in four  
563 MSAs centered on (A,B) Dallas, (C,D) Houston, (E,F) New York City, and (G,H) Phoenix.  
564 Inferences are based on daily reports of new cases from January 21, 2020 to October 31, 2021.  
565 For each of the right panels, the 95% credible intervals for Alpha and Delta takeoff times are  
566 indicated in parentheses, and the MAP estimate for a given region is indicated to the left of the  
567 credible interval.

568



569

## 570 APPENDIX

### 571 Imputation of Missing Daily Case Counts

572 By October 31, 2021, many regions in the US were not reporting new detected COVID-  
573 19 cases on a strictly daily basis. When one or more daily case counts were not available, we  
574 imputed daily case counts on the basis of a linear fit to the two nearest available cumulative case  
575 counts. This approach has the effect of evenly distributing case counts across the days for which  
576 daily reports are unavailable.

### 577 Equations of the Compartmental Model

578 The compartmental model, which is illustrated in Figure 1 and Appendix Figure 1,  
579 consists of the following 40 ordinary differential equations (ODEs):

$$\begin{aligned} \frac{dS_M}{dt} = & -\beta Y_\theta(t) \left(\frac{S_M}{S_0}\right) (\phi_M(t, \rho) + m_b \phi_P(t, \rho)) & (1) \\ & - U_\sigma(t) \Lambda_\tau(t) [P_\tau(t) S_M - (1 - P_\tau(t)) S_P] - \mu(t) S_0 \left(\frac{S_M}{\phi_V(t)}\right) \end{aligned}$$

$$\begin{aligned} \frac{dS_P}{dt} = & -m_b \beta Y_\theta(t) \left(\frac{S_P}{S_0}\right) (\phi_M(t, \rho) + m_b \phi_P(t, \rho)) & (2) \\ & + U_\sigma(t) \Lambda_\tau(t) [P_\tau(t) S_M - (1 - P_\tau(t)) S_P] - \mu(t) S_0 \left(\frac{S_P}{\phi_V(t)}\right) \end{aligned}$$

$$\begin{aligned} \frac{dE_{1,M}}{dt} = & \beta Y_\theta(t) \left(\frac{S_M}{S_0}\right) (\phi_M(t, \rho) + m_b \phi_P(t, \rho)) - k_L E_{1,M} & (3) \\ & - U_\sigma(t) \Lambda_\tau(t) [P_\tau(t) E_{1,M} - (1 - P_\tau(t)) E_{1,P}] \end{aligned}$$

$$\frac{dE_{1,P}}{dt} = m_b \beta Y_\theta(t) \left( \frac{S_P}{S_0} \right) (\phi_M(t, \rho) + m_b \phi_P(t, \rho)) - k_L E_{1,P} \quad (4)$$

$$+ U_\sigma(t) \Lambda_\tau(t) [P_\tau(t) E_{1,M} - (1 - P_\tau(t)) E_{1,P}]$$

$$\frac{dE_{i,M}}{dt} = k_L E_{i-1,M} - k_L E_{i,M} - k_Q E_{i,M} - U_\sigma(t) \Lambda_\tau(t) [P_\tau(t) E_{i,M} - (1 - P_\tau(t)) E_{i,P}], \quad (5)$$

for  $i = 2, 3, 4, 5$

$$\frac{dE_{i,P}}{dt} = k_L E_{i-1,P} - k_L E_{i,P} - k_Q E_{i,P} + U_\sigma(t) \Lambda_\tau(t) [P_\tau(t) E_{i,M} - (1 - P_\tau(t)) E_{i,P}], \quad (6)$$

for  $i = 2, 3, 4, 5$

$$\frac{dE_{2,Q}}{dt} = k_Q (E_{2,M} + E_{2,P}) - k_L E_{2,Q} \quad (7)$$

$$\frac{dE_{i,Q}}{dt} = k_Q (E_{i,M} + E_{i,P}) + k_L E_{i-1,Q} - k_L E_{i,Q}, \text{ for } i = 3, 4, 5 \quad (8)$$

$$\frac{dA_M}{dt} = f_A k_L E_{5,M} - k_Q A_M - U_\sigma(t) \Lambda_\tau(t) [P_\tau(t) A_M - (1 - P_\tau(t)) A_P] - c_A A_M \quad (9)$$

$$\frac{dA_P}{dt} = f_A k_L E_{5,P} - k_Q A_P + U_\sigma(t) \Lambda_\tau(t) [P_\tau(t) A_M - (1 - P_\tau(t)) A_P] - c_A A_P \quad (10)$$

$$\frac{dA_Q}{dt} = f_A k_L E_{5,Q} + k_Q (A_M + A_P) - c_A A_Q \quad (11)$$

$$\frac{dI_M}{dt} = (1 - f_A) k_L E_{5,M} - (k_Q + j_Q) I_M - U_\sigma(t) \Lambda_\tau(t) [P_\tau(t) I_M - (1 - P_\tau(t)) I_P] \quad (12)$$

$$- c_I I_M$$

$$\frac{dI_P}{dt} = (1 - f_A) k_L E_{5,P} - (k_Q + j_Q) I_P + U_\sigma(t) \Lambda_\tau(t) [P_\tau(t) I_M - (1 - P_\tau(t)) I_P] - c_I I_P \quad (13)$$

$$\frac{dI_Q}{dt} = (1 - f_A)k_L E_{5,Q} + (k_Q + j_Q)(I_M + I_P) - c_I I_Q \quad (14)$$

$$\frac{dH_U}{dt} = f_H c_I (I_M + I_P + I_Q) - c_H H_U \quad (15)$$

$$\frac{dD}{dt} = (1 - f_R) c_H H_U + (1 - f_R) c_H H_V \quad (16)$$

$$\frac{dR_U}{dt} = c_A (A_M + A_P + A_Q) + (1 - f_H) c_I (I_M + I_P + I_Q) + f_R c_H H_U - \mu(t) S_0 \left( \frac{R_U}{\phi_V(t)} \right) \quad (17)$$

$$\frac{dV_1}{dt} = \mu(t) S_0 \left( \frac{S_M + S_P}{\phi_V(t)} \right) - k_V V_1 - \beta Y_\theta(t) \left( \frac{V_1}{S_0} \right) (\phi_M(t, \rho) + m_b \phi_P(t, \rho)) \quad (18)$$

$$\frac{dV_i}{dt} = k_V V_{i-1} - k_V V_i - \beta Y_\theta(t) \left( \frac{V_i}{S_0} \right) (\phi_M(t, \rho) + m_b \phi_P(t, \rho)), \quad (19)$$

for  $i = 2, 3, 4, 5, 6$

$$\frac{dS_{V,1}}{dt} = (1 - f_0) k_V V_6 - \beta Y_\theta(t) \left( \frac{S_{V,1}}{S_0} \right) (\phi_M(t, \rho) + m_b \phi_P(t, \rho)) \quad (20)$$

$$\frac{dS_{V,2}}{dt} = (f_0 - f_1) k_V V_6 - U_{\theta_1}(t) \beta Y_\theta(t) \left( \frac{S_{V,2}}{S_0} \right) (\phi_M(t, \rho) + m_b \phi_P(t, \rho)) \quad (21)$$

$$\frac{dS_{V,3}}{dt} = (f_1 - f_2) k_V V_6 - U_{\theta_2}(t) \beta Y_\theta(t) \left( \frac{S_{V,3}}{S_0} \right) (\phi_M(t, \rho) + m_b \phi_P(t, \rho)) \quad (22)$$

$$\frac{dS_{V,4}}{dt} = f_2 k_V V_6 \quad (23)$$

$$\frac{dE_V}{dt} = \beta Y_\theta(t) \left( \frac{1}{S_0} \right) (\phi_M(t, \rho) + m_b \phi_P(t, \rho)) \quad (24)$$

$$\cdot \sum_{i=1}^6 (V_i + S_{V,1} + U_{\theta_1}(t)S_{V,2} + U_{\theta_2}(t)S_{V,3}) - \left( \frac{k_L}{5} \right) E_V$$

$$\frac{dA_V}{dt} = f_A \left( \frac{k_L}{5} \right) E_V - c_A A_V \quad (25)$$

$$\frac{dI_V}{dt} = (1 - f_A) \left( \frac{k_L}{5} \right) E_V - c_I I_V \quad (26)$$

$$\frac{dH_V}{dt} = m_h f_H c_I I_V - c_H H_V \quad (27)$$

$$\frac{dR_V}{dt} = \mu(t) S_0 \left( \frac{R_U}{\phi_V(t)} \right) + c_A A_V + (1 - m_h f_H) c_I I_V + f_R c_H H_V \quad (28)$$

580 In these equations, the independent variable is time  $t$ , and the state variables ( $S_M, S_P,$   
581  $E_{1,M}, \dots, E_{5,M}, E_{1,P}, \dots, E_{5,P}, E_{2,Q}, \dots, E_{5,Q}, A_M, A_P, A_Q, I_M, I_P, I_Q, H_U, D, R_U, V_1, \dots, V_6,$   
582  $S_{V,1}, \dots, S_{V,4}, E_V, A_V, I_V, H_V,$  and  $R_V$ ) represent 40 (sub)populations (Appendix Table 1), which  
583 change over time. Thus, each ODE in Equations (1)–(28) defines the time-rate of change of a  
584 population, i.e., the time-rate of change of a state variable. Note that Equations (5), (6), (8) and  
585 (19) define 4, 4, 3, and 5 ODEs of the model, respectively. The model is formulated such that  $S_0,$   
586 the total population, is a constant. Thus, the model does not account for birth, death for reasons  
587 other than COVID-19, immigration, or emigration.

588 The initial condition associated with Equations (1)–(28) is taken to be  $S_M(t_0) = S_0,$   
589  $I_M(t_0) = I_0 = 1,$  and all other populations ( $S_P, E_{1,M}, \dots, E_{5,M}, E_{1,P}, \dots, E_{5,P}, E_{2,Q}, \dots, E_{5,Q}, A_M,$   
590  $A_P, A_Q, I_P, I_Q, H_U, D, R_U, V_1, \dots, V_6, S_{V,1}, \dots, S_{V,4}, E_V, A_V, I_V, H_V,$  and  $R_V$ ) are equal to 0. Recall

591 that the parameter  $S_0$  denotes the total region-specific population size. Thus, we assume that the  
592 entire population is susceptible at the start of the local epidemic at time  $t = t_0 > 0$ , where time  
593  $t = 0$  corresponds to 0000 hours (midnight) on January 21, 2020. The parameter  $I_0$  denotes the  
594 number of infectious symptomatic persons at the start of the regional epidemic.

595 In the model, the parameters  $\beta$ ,  $k_L$ ,  $k_Q$ ,  $j_Q$ ,  $c_A$ ,  $c_I$ ,  $c_H$ , and  $k_V$  are positive-valued rate  
596 constants (all with units of  $d^{-1}$ ), and the parameters  $m_b$ ,  $m_h$ ,  $f_A$ ,  $f_H$ ,  $f_R$ ,  $f_0 \geq f_1$ ,  $f_1 \geq f_2$ , and  $f_2$   
597 are (dimensionless) fractions. Brief definitions of parameters are given in Tables 1 and 2.

598 In the model, the quantities  $\phi_M(t, \rho)$ ,  $\phi_P(t, \rho)$ , and  $\phi_V(t)$  are functions of (time-  
599 dependent) state variables (as defined below), which represent the population of infectious  
600 persons who are mixing freely (i.e., not practicing social distancing), the population of infectious  
601 persons who are practicing social distancing (i.e., adopting disease-avoiding behaviors), and the  
602 population of persons eligible for vaccination, respectively. The quantities  $\phi_M(t, \rho)$  and  $\phi_P(t, \rho)$   
603 are also functions of  $\rho \equiv (\rho_E, \rho_A)$ , where  $\rho_E$  ( $\rho_A$ ) is a dimensionless ratio representing the  
604 infectiousness of persons in the incubation phase of infection (the infectiousness of  
605 asymptomatic persons in the immune clearance phase of infection) relative to the infectiousness  
606 of symptomatic persons with the same social-distancing behavior. The quantity  $\phi_V(t)$  represents  
607 the population of persons eligible for vaccination.

$$\phi_M(t, \rho) = I_M + I_V + \rho_E(E_{2,M} + E_{3,M} + E_{4,M} + E_{5,M} + E_V) + \rho_A(A_M + A_V) \quad (29)$$

$$\phi_P(t, \rho) = I_P + \rho_E(E_{2,P} + E_{3,P} + E_{4,P} + E_{5,P}) + \rho_A A_P \quad (30)$$

$$\phi_V(t) = S_M + S_P + \sum_{i=1}^5 (E_{i,M} + E_{i,P}) + A_M + A_P + R_U \quad (31)$$

608 The state variables that appear in these equations represent time-varying populations. Recall that  
609 state variables are defined in Appendix Table 1.

610 In the model, the quantities  $U_\sigma(t)$ ,  $U_{\theta_1}(t)$ , and  $U_{\theta_2}(t)$  are unit step functions. The values  
611 of these functions change from 0 to 1 at the times indicated by the subscripts:  $\sigma$ , the onset time of  
612 the initial social-distancing period;  $\theta_1$ , the takeoff time of SARS-CoV-2 variant Alpha; and  $\theta_2$ ,  
613 the takeoff time of SARS-CoV-2 variant Delta.

$$U_\sigma(t) = \begin{cases} 0 & t < \sigma \\ 1 & t \geq \sigma \end{cases} \quad (32)$$

$$U_{\theta_1}(t) = \begin{cases} 0 & t < \theta_1 \\ 1 & t \geq \theta_1 \end{cases} \quad (33)$$

$$U_{\theta_2}(t) = \begin{cases} 0 & t < \theta_2 \\ 1 & t \geq \theta_2 \end{cases} \quad (34)$$

614 As indicated in Appendix Figure 1, transitions from  $S_M$  to  $S_P$ , for example, become possible at  
615 time  $t = \sigma$ , transitions from  $S_{V,2}$  to  $E_V$  become possible at time  $t = \theta_1$ , and transitions from  $S_{V,3}$   
616 to  $E_V$  become possible at time  $t = \theta_2$ .

617 In the model, the quantities  $P_\tau(t)$ , and  $\Lambda_\tau(t)$  are step functions that characterize changes  
618 in social distancing. The value of  $P_\tau(t)$  determines a setpoint steady-state fraction of susceptible  
619 persons who are practicing social distancing. The value of  $\Lambda_\tau(t)$  determines a time scale for  
620 approach to the setpoint steady state. Changes in the values of  $P_\tau(t)$  and  $\Lambda_\tau(t)$  occur  
621 coordinately. These changes occur at times  $t = \sigma, \tau_1, \dots, \tau_n$ , where  $n$  is the number of distinct

622 social-distancing periods beyond an initial social-distancing period. Initially, we took  $n = 7$  (i.e.,  
623 8 total social-distancing stages). The value of  $n$  is decremented by 1 (at an inferred time) if  $n \leftarrow$   
624  $n - 1$  is determined to be admissible by a model-selection procedure, which is described below.  
625 It should be noted that  $p_0, p_1, \dots, p_n$  are parameters of  $P_\tau(t)$  and that  $\lambda_0, \lambda_1, \dots, \lambda_n$  are parameters  
626 of  $\Lambda_\tau(t)$ . These parameters determine the non-zero values of the step functions over different  
627 periods. For example,  $p_1$  is the value of  $P_\tau(t)$  and  $\lambda_1$  is the value of  $\Lambda_\tau(t)$  for the period  $t \in$   
628  $[\tau_1, \tau_2)$ .

$$P_\tau(t) = \begin{cases} p_0 & \sigma \leq t < \tau_1 \\ p_1 & \tau_1 \leq t < \tau_2 \\ \vdots & \vdots \\ p_n & \tau_n \leq t < \infty \end{cases} \quad (35)$$

$$\Lambda_\tau(t) = \begin{cases} \lambda_0 & \sigma \leq t < \tau_1 \\ \lambda_1 & \tau_1 \leq t < \tau_2 \\ \vdots & \vdots \\ \lambda_n & \tau_n \leq t < \infty \end{cases} \quad (36)$$

629 The values of  $P_\tau(t)$  and  $\Lambda_\tau(t)$  are 0 for  $t < \sigma$ .

630 In the model, the quantity  $\mu(t)$  is a piecewise linear interpolant to a function  $\tilde{\mu}(t)$  that  
631 characterizes the current rate of vaccination. The value of  $\tilde{\mu}(t)$  is determined by the empirical  
632 daily rate of vaccination, and thus, can vary from day to day. Daily vaccination data were  
633 extracted from the Covid Act Now database using the Covid Act Now Data API [1]. We will use  
634  $\mu_i$  to refer to the value of  $\tilde{\mu}(t)$  for  $t \in [t_i, t_{i+1})$ , where time  $t_i$  corresponds to midnight on the  $i$ th  
635 day after January 21, 2020.

$$\tilde{\mu}(t) = \mu_i \text{ for } t \in [t_i, t_{i+1}) \quad (37)$$

636 Settings for  $\mu_i$  were made such that  $\mu_i S_0 \times 1$  d is the number of vaccinations completed in the  
637 nearest past 1-d period according to Covid Act Now data.

638 In the model, the quantity  $Y_\theta(t)$  is a step function that quantifies how disease  
639 transmissibility increases upon emergence of SARS-CoV-2 variants Alpha and Delta. Initially,  
640  $Y_\theta(t) = 1$ . The value of  $Y_\theta(t)$  is increased (by an inferred factor greater than 1 at an inferred  
641 time,  $\theta_1$  or  $\theta_2$ ) if the change is determined to be admissible by a model-selection procedure,  
642 which is described below. It should be noted that  $y_1$  and  $y_2$  are parameters of  $Y_\theta(t)$ . These  
643 parameters determine the values of the step function  $Y_\theta(t)$  over different periods:  $y_1$  is the value  
644 of  $Y_\theta(t)$  for the period  $t \in [\theta_1, \theta_2)$  and  $y_2$  is the value of  $Y_\theta(t)$  for the remaining period of  
645 concern (with Delta as the dominant circulating viral strain).

$$Y_\theta(t) = \begin{cases} y_0 & \theta_0 \leq t < \theta_1 \\ y_1 & \theta_1 \leq t < \theta_2 \\ \vdots & \vdots \\ y_m & \theta_m \leq t < \infty \end{cases} \quad (38)$$

646 where  $m$  is the number of viral variants that have emerged up to the current time,  $\theta_0 \equiv t_0$ , and  
647  $y_0 \equiv 1$ . Here, we consider  $m = 2$ .

## 648 Equations of the Auxiliary Measurement Model

649 As in the study of Lin et al. [2], we assumed that only symptomatic persons are detected  
650 in testing. The accumulation of symptomatic persons is governed by

$$\frac{dC_S}{dt} = (1 - f_A) \left[ k_L (E_{5,M} + E_{5,P} + E_{5,Q}) + \left( \frac{k_L}{5} \right) E_V \right] \quad (39)$$

651 where  $C_S(t)$  is the cumulative number of symptomatic persons (cases) at time  $t$ . Here, unlike in  
652 the study of Lin et al. [2], the expression for  $C_S(t)$  accounts for exposed persons in quarantine.



653 Initially,  $C_S = 0$ . We numerically integrated Appendix Equation (39) together with the ODEs of  
654 the compartmental model. From the trajectory for  $C_S$ , we derive a prediction for the expected  
655 number of new COVID-19 cases reported on calendar date  $\mathcal{D}_i$ ,  $I(t_i, t_{i+1})$ , using the following  
656 equation:

$$I(t_i, t_{i+1}) = f_D [C_S(t_{i+1}) - C_S(t_i)] \quad (40)$$

657 where  $f_D$  is an adjustable region-specific parameter characterizing the time-averaged fraction of  
658 symptomatic cases detected and reported,  $t_i$  corresponds to midnight on the  $i$ th day after January  
659 21, 2020, and  $t_{i+1} - t_i$  is the reporting interval (1 d). We compare  $I(t_i, t_{i+1})$  to  $\delta C_i$ , the number  
660 of new cases reported on calendar date  $\mathcal{D}_i$ .

### 661 **Definition of the Likelihood Function**

662 Bayesian inference relies on the definition of a likelihood, which here serves the purpose  
663 of assessing the compatibility of available surveillance data with adjustable (free) parameter  
664 values. Let us use  $\{\delta C_i\}_{i=0}^d$  to denote the daily case reporting data available between 0 and  $d$   
665 days after midnight on January 21, 2020 (the date of the first case report in the US) and let  
666  $D = \{\delta C_i\}_{i=0}^d$ . Let us use  $\theta_F(n, m)$  to denote the set of adjustable (free) parameter values. The  
667 number of adjustable parameters,  $|\theta_F|$ , depends on  $n$ , the number of social-distancing periods  
668 considered beyond an initial social-distancing period, and  $m$ , the number of SARS-CoV-2  
669 variants under consideration. As in the study of Lin et al. [2], we assume that  $\delta C_i$ , the number of  
670 new COVID-19 cases detected over a 1-d period and reported on calendar date  $\mathcal{D}_i$  for a given  
671 region, is a random variable and its expected value follows a model-derived deterministic  
672 trajectory given by  $I(t_i, t_{i+1})$  (Equation 40). We assume that day-to-day fluctuations in the  
673 random variable are independent and characterized by a negative binomial distribution  $\text{NB}(r, q_i)$ ,

674 which has two parameters,  $r > 0$  and  $q_i \in (0,1)$ . Note that  $\mathbb{E}[\text{NB}(r, q_i)] = r(1 - q_i)/q_i$ . We  
675 assume that this distribution has the same dispersion parameter  $r$  across all case reports. With  
676 these assumptions, we arrive at the following likelihood function:

$$\mathcal{L}(\theta_F(n, m); \{\delta C_i\}_{i=0}^d) = \prod_{i=0}^d \mathcal{L}_i(\theta_F(n, m); \delta C_i) \quad (41)$$

677 where

$$\mathcal{L}_i(\theta_F(n, m); \delta C_i) = \text{nbinom}(\delta C_i; r, q_i) = \binom{\delta C_i + r - 1}{\delta C_i - 1} q_i^r (1 - q_i)^{\delta C_i} \quad (42)$$

678 and

$$q_i = \frac{r}{r + I(t_i, t_{i+1})}. \quad (43)$$

679 In these equations,  $i$  is an integer indicating the date  $\mathcal{D}_i$  and period  $(t_i, t_{i+1})$ ;  $\text{nbinom}(\delta C_i; r, q_i)$   
680 is the probability mass function of the negative binomial distribution  $\text{NB}(r, q_i)$ , and  $\theta_F(n, m) =$   
681  $\{t_0, \beta, \sigma, \tau_1, \dots, \tau_n, p_0, p_1, \dots, p_n, \lambda_0, \lambda_1, \dots, \lambda_n, \theta_1, \dots, \theta_m, y_1, \dots, y_m, f_D, r\}$  for  $n \geq 1$  and  $m \geq 1$ ;  
682  $\theta_F(0,0) = \{t_0, \beta, p_0, \lambda_0, f_D, r\}$ .

### 683 **Parameters**

684 Each model parameter is briefly described in Tables 1–3. These parameters have either  
685 fixed values or adjustable values (i.e., values inferred from surveillance data). The fixed values  
686 may be universal (i.e., applicable to all MSAs of interest) or MSA-specific. All inferred  
687 parameter values are MSA-specific. In addition, the measurement model (Appendix Equations  
688 39 and 40) has one adjustable MSA-specific parameter,  $f_D$ , and the likelihood function

689 (Appendix Equations 41–43) has one adjustable MSA-specific parameter,  $r$ . Values of the other  
690 likelihood parameters,  $q_0, \dots, q_d$ , are constrained and are determined using Appendix Equation  
691 43.

692 The model shares  $19 + 3n$  parameters with the model of Lin et al. [2], including  
693 parameters that define the initial condition ( $t_0$ ,  $I_0$ , and  $S_0$ ). (Recall that  $n$  is the number of social-  
694 distancing periods being considered beyond the initial social-distancing period.) The shared  
695 parameters are  $t_0$ ,  $I_0$ ,  $S_0$ ,  $\beta$ ,  $\sigma$ ,  $\tau_1, \dots, \tau_n$ ,  $p_0, \dots, p_n$ ,  $\lambda_0, \dots, \lambda_n$ ,  $\rho_A$ ,  $\rho_E$ ,  $m_b$ ,  $f_A$ ,  $f_H$ ,  $f_R$ ,  $k_L$ ,  $k_Q$ ,  $j_Q$ ,  
696  $c_A$ ,  $c_H$ , and  $c_I$ . As in the study of Lin et al. [2], we inferred MSA-specific values for the  
697 following parameters:  $t_0$ ,  $\beta$ ,  $\sigma$ ,  $p_0, \dots, p_n$ , and  $\lambda_0, \dots, \lambda_n$ . We also inferred MSA-specific values  
698 for  $\tau_1, \dots, \tau_n$  provided that  $n \geq 1$ . As in the study of Lin et al. [2], the remaining 14 parameters  
699 shared between the old and new models ( $I_0$ ,  $S_0$ ,  $\rho_A$ ,  $\rho_E$ ,  $m_b$ ,  $f_A$ ,  $f_H$ ,  $f_R$ ,  $k_L$ ,  $k_Q$ ,  $j_Q$ ,  $c_A$ ,  $c_H$ , and  $c_I$ )  
700 were taken to have fixed values, and we adopted the settings of Lin et al. [2] for these parameters  
701 (Table 3). These settings are universal except for the setting for  $S_0$ , the total population, which is  
702 MSA-specific.

703 Our extension of the model of Lin et al. [2] introduces  $5 + 2(m + 1) + (d + 1)$   
704 parameters, where  $m$  ( $= 0, 1$  or  $2$ ) is the number of SARS-CoV-2 variants being considered and  
705  $d$  is the number of days since January 21, 2020:  $\theta_0, \dots, \theta_m$ ,  $y_0, \dots, y_m$ ,  $m_h$ ,  $f_0$ ,  $f_1$ ,  $f_2$ ,  $k_V$ , and  
706  $\mu_0, \dots, \mu_d$ . The  $\theta$  and  $y$  parameters are variant takeover times and transmissibility factors,  
707 respectively, except that the value of  $\theta_0$  is defined as  $t_0$  and the value of  $y_0$  is defined as 1. The  
708 Alpha transmissibility factor  $y_1$ , the Alpha takeoff time  $\theta_1$ , the Delta transmissibility factor  $y_2$ ,  
709 and the Delta takeoff time  $\theta_2$  were inferred for each MSA with  $m = 2$  (cf. Table 1). The  
710 transmissibility factors were each constrained to be greater than or equal to 1. The settings for

711  $\mu_0, \dots, \mu_d$  are empirical and MSA-specific. Each  $\mu_i$  is set such that  $\mu_i S_0 \times 1$  d is the number of  
712 vaccinations completed over the past 1-d period nearest to the  $i$ th day after January 21, 2020. As  
713 noted earlier, the number of completed vaccinations was obtained for each MSA from Covid Act  
714 Now using the Covid Act Now Data API [1]. In the spreadsheet accessed daily, the  
715 ‘metrics.vaccinationsCompletedRatio’ column gives the percentage of the total population that  
716 has received the recommended number of doses: one dose for Ad26.CoV2.S (Janssen, Johnson  
717 & Johnson) or two doses for mRNA-1273 (Moderna) and BNT162b2 (Pfizer-BioNTech). As a  
718 simplification, we considered all completed vaccinations to be equivalent. The parameters  $m_h$ ,  
719  $f_0, f_1, f_2$ , and  $k_V$  were assigned fixed universal estimates (Table 3). Each of these estimates is  
720 explained below.

721 The rate constant  $k_V$  characterizes the rate of transition out of compartment  $V_i$  for  $i =$   
722  $1, \dots, n_V$ . Recall that, in the model, susceptible persons enter  $V_1$  upon vaccination (Figure 1,  
723 Appendix Figure 1). The values of  $n_V (= 6)$  and  $k_V (= 0.3 \text{ d}^{-1})$  were selected so that the time a  
724 person spends in  $V_1, \dots, V_{n_V}$ , which we will denote as  $t_V$ , is distributed approximately the same as  
725  $\tilde{t}_V$ , the waiting time between vaccination of a previously uninfected person and detection of  
726 vaccine-induced SARS-CoV-2-specific IgG antibodies [3] (Appendix Figure 2). According to  
727 the model, the time that a person spends in  $V_1, \dots, V_{n_V}$  is distributed according to the probability  
728 density function  $f(t_V; n_V, k_V) = k_V^{n_V} t_V^{n_V-1} e^{-k_V t_V} / (n_V - 1)!$ , i.e.,  $t_V$  is Erlang distributed with  
729 shape parameter  $n_V = 6$  and rate parameter  $k_V = 0.3 \text{ d}^{-1}$ . As can be seen in Appendix Figure 2,  
730 the cumulative distribution function of this Erlang distribution reasonably captures the empirical  
731 cumulative distribution of waiting times observed in the longitudinal study of Korodi et al. [3].  
732 Thus, in the model, passage through  $V_1, \dots, V_6$  with rate constant  $k_V = 0.3 \text{ d}^{-1}$  accounts for the

733 variable and significantly non-zero amount of time required for development of a protective  
734 antibody response after vaccination.

735         The parameters  $f_0 > f_1$ ,  $f_1 > f_2$ , and  $f_2$  are fractions that characterize the average  
736 effectiveness of vaccines used in the US and that determine the sizes of (mutually exclusive)  
737 subpopulations of vaccinated persons having different susceptibilities to productive infection  
738 (i.e., an infection that can be transmitted to others):  $S_{V,1}$ ,  $S_{V,2}$ ,  $S_{V,3}$ , and  $S_{V,4}$  (Figure 1, Appendix  
739 Figure 1). We assume that persons in the  $S_{V,1}$  subpopulation are susceptible to productive  
740 infection by any of the viral strains considered, and in contrast, we assume that persons in the  
741  $S_{V,4}$  subpopulation are susceptible to productive infection by none of the viral strains considered.  
742 Persons in the  $S_{V,2}$  subpopulation are taken to be susceptible to productive infection by the Alpha  
743 and Delta variants but not viral strains in circulation before the emergence of Alpha. Persons in  
744 the  $S_{V,3}$  subpopulation are taken to be susceptible to productive infection by the Delta variant but  
745 not the Alpha variant or viral strains in circulation before the emergence of Alpha. The quantity  
746  $1 - f_0$  defines the fraction of vaccinated persons who enter the  $S_{V,1}$  subpopulation after exiting  
747  $V_6$ , the quantity  $f_0 - f_1$  defines the fraction of vaccinated persons who enter the  $S_{V,2}$   
748 subpopulation after exiting  $V_6$ , the quantity  $f_1 - f_2$  defines the fraction of vaccinated persons  
749 who enter the  $S_{V,3}$  subpopulation after exiting  $V_6$ , and  $f_2$  defines the fraction of vaccinated  
750 persons who enter the  $S_{V,4}$  subpopulation after exiting  $V_6$ . We take  $f_0$  to characterize vaccine  
751 effectiveness before the emergence of Alpha. According to Thompson et al. [4], vaccine  
752 effectiveness was initially 90%. Thus, we set  $f_0 = 0.9$ . We take  $f_1$  to characterize vaccine  
753 effectiveness after the emergence of Alpha but before the emergence of Delta. According to  
754 Puranik et al. [5], in May 2021, vaccine effectiveness was 81%. Thus, we set  $f_1 = 0.81$ . We take  
755  $f_2$  to characterize vaccine effectiveness after the emergence of Delta. According to Tang et al.

756 [6], the effectiveness of two doses of the Pfizer-BioNTech vaccine (BNT162b2) against Delta is  
757 53.5% and the effectiveness of two doses of the Moderna vaccine (mRNA-1273) against Delta is  
758 84.8%. Taking the average of these figures, we set  $f_2 = 0.69$ .

759 The parameter  $m_h$  characterizes the reduced risk of severe disease for a vaccinated  
760 person in the case of a breakthrough infection. We set  $m_h = 0.04$ , i.e., we assumed that there is a  
761 25-fold reduction in the risk of severe disease for infected persons who have been vaccinated,  
762 which is consistent with the observations of Lopez Bernal et al. [7].

### 763 **Notable New Modeling Assumptions**

764 It should be noted that we treat the incubation period for newly infected (exposed)  
765 vaccinated persons differently than for newly infected (exposed) unvaccinated persons (Figure 1,  
766 Appendix Figure 1). For unvaccinated persons, as in the study of Lin et al. [2], we divide  
767 exposed persons in the incubation period of infection into five subpopulations:  $E_{1,M}, \dots, E_{5,M}$  for  
768 exposed persons who are mixing (i.e., persons who are not practicing social distancing),  
769  $E_{1,P}, \dots, E_{5,P}$  for exposed persons who are practicing social distancing, and  $E_{1,Q}, \dots, E_{5,Q}$  for  
770 exposed quarantined persons. Persons move through the five stages of the incubation period  
771 sequentially. In contrast, as a simplification, for vaccinated persons, we consider only a single  
772 exposed population:  $E_V$ . We take persons to exit  $E_V$  with rate constant  $k_L/5$  (Appendix Figure  
773 1). With this choice, the duration of the incubation period of infection is the same, on average,  
774 for both vaccinated and unvaccinated persons. The average duration is  $5/k_L$  (about 5 d) in both  
775 cases. The difference is that the duration of the incubation period is Erlang distributed for  
776 unvaccinated persons, as discussed by Lin et al. [2], but exponentially distributed for vaccinated  
777 persons.

778 As indicated in Equation (29), we take vaccinated persons with productive infections to  
779 be equally as infectious as unvaccinated persons.

780 As noted earlier, we take all vaccinated persons to be mixing (i.e., to not be practicing  
781 social distancing). Thus, populations of infected vaccinated persons ( $E_V$ ,  $I_V$ , and  $A_V$ ) contribute  
782 to  $\phi_M(t)$  (Appendix Equation 29) but not  $\phi_P(t)$  (Appendix Equation 30).

783 As indicated in Appendix Equation 31, we consider pre-symptomatic exposed and  
784 asymptomatic unvaccinated persons to be eligible for vaccination and, thus, these persons  
785 contribute to the consumption of vaccine doses (i.e., these persons account for a portion of the  
786 number of completed vaccinations on a given day  $i$ ,  $\mu_i S_0 \times 1$  d). However, we do not move  
787 these persons to vaccinated compartments. The reason is that exposed and asymptomatic persons  
788 are expected to develop immunity faster through recovery from infection (i.e., movement to  $R_U$ )  
789 than from vaccination.

790 As indicated in Appendix Equation 31, we do not consider symptomatic, quarantined,  
791 severely ill and hospitalized/isolated-at-home, and deceased persons to be eligible for  
792 vaccination.

## 793 **Inference Approach**

794 Recall that  $\theta_F$  denotes the set of all adjustable parameters. As in the study of Lin et al.  
795 [2], for each MSA, we inferred MSA-specific adjustable parameter values  $\theta_F$  using all MSA-  
796 specific surveillance data available up to a specified day of inference  $\mathcal{D}_d$  (i.e., the  $d$ th day after  
797 January 21, 2020). We took a Bayesian inference approach, meaning that, for a given dataset, we  
798 generated parameter posterior samples (a collection of  $\theta_F$ 's) through Markov chain Monte Carlo  
799 (MCMC) sampling. The parameter posterior samples provide a probabilistic characterization of

800 the adjustable parameter values consistent with the dataset used in inference. By drawing  
801 samples from the parametric posterior distribution, we generated a posterior predictive  
802 distribution for  $I(t_i, t_{i+1})$  for each  $i$  of interest. We considered all days from January 21, 2020 to  
803 October 31, 2021. In other words, for each  $i$  of interest, a prediction for  $I(t_i, t_{i+1})$  was generated  
804 for each of many  $\theta_F$ 's drawn randomly (with uniform probability) from the parametric posterior  
805 distribution. The resulting distribution of  $I(t_i, t_{i+1})$  values is the posterior predictive distribution  
806 for  $I(t_i, t_{i+1})$ . Recall that  $I(t_i, t_{i+1})$  is given by Appendix Equation 40 and corresponds to  
807  $\mathbb{E}[\delta C_i]$ , the expected number of new COVID-19 cases detected over a 1-d surveillance interval  
808 and reported for the  $i$ th day after January 21, 2020. Observation noise was injected into the  
809 posterior predictive distributions by replacing each sampled value for  $I(t_i, t_{i+1})$  with  
810  $X_i \sim \text{NB}(r, q_i)$ , where  $r$  is a member of the sampled set of parameter values  $\theta_F$  used to generate  
811 the prediction of  $I(t_i, t_{i+1})$  and  $q_i$  is given by Equation 43.

812 According to Bayes' theorem, given surveillance data  $D = \{\delta C_i\}_{i=0}^d$ , the parametric  
813 posterior is given as

$$\mathbb{P}\{\theta_F | D\} = \frac{\mathbb{P}\{D | \theta_F\} \mathbb{P}\{\theta_F\}}{Z} \quad (44)$$

814 where  $\mathbb{P}\{\theta_F\}$  is the prior (which is formulated to capture knowledge of  $\theta_F$  external to  $D$  or to  
815 express lack of such knowledge),  $\mathbb{P}\{D | \theta_F\}$  is the likelihood defined by Appendix Equations 41–  
816 43, and  $Z$  is a normalizing constant. We assumed a proper uniform prior, i.e., for each adjustable  
817 parameter, we assumed that all values between specified lower and upper bounds are equally  
818 likely before consideration of  $D$ . We used the same bounds as in the study of Lin et al. [2]. Then  
819 we used an adaptive MCMC (aMCMC) algorithm [8] to generate samples from  $\mathbb{P}\{D | \theta_F\} \mathbb{P}\{\theta_F\}$ ,



820 which is proportional to  $\mathbb{P}\{\theta_F|D\}$ . Thus, the relative probabilities of parameter sets  $\theta_F$  according  
821 to  $\mathbb{P}\{\theta_F|D\}$  are correctly represented by the samples.

822 Specifically, the adaptive MCMC algorithm [8] generates samples from the multivariate  
823 parametric posterior for adjustable model parameters ( $t_0$ ,  $\beta$ , and parameters for variant  
824 emergence and social distancing), the measurement model parameter  $f_D$ , and the likelihood  
825 parameter  $r$  (Tables 1 and 2). This algorithm is available within the PyBioNetFit software  
826 package [9]. Use of the algorithm was performed as described by Lin et al. [2]. The report of  
827 Neumann et al. [9] includes helpful general usage advice, which was followed in this study.  
828 Inference jobs were executed on a computer cluster.

829 Each inference was conditioned on the compartmental model of Figure 1 (Appendix  
830 Equations 1–38), settings for the structural parameters  $m$  (the number of SARS-CoV-2 variants  
831 under consideration) and  $n$  (the number of social-distancing periods under consideration beyond  
832 an initial social-distancing period), the measurement model (Appendix Equations 39 and 40), and  
833 fixed parameter estimates (Tables 1 and 2), including empirical daily *per-capita* vaccination  
834 rates (i.e., the settings for  $\mu_i$  in Appendix Equation 37). We assumed a proper uniform prior for  
835 each adjustable parameter [2] and a negative binomial likelihood function (Appendix Equations  
836 41–43). Use of proper uniform priors means that MAP estimates are maximum likelihood  
837 estimates (MLEs). In each inference, the data entering the likelihood function,  $D = \{\delta C_i\}_{i=0}^d$   
838 (Appendix Equation 41), were MSA-specific daily reports of newly detected COVID-19 cases  
839 available up to the date of inference  $\mathcal{D}_d$  (i.e., the  $d$ -th day after January 21, 2020). Thus, all  
840 inferences are region-specific and time-dependent.

#### 841 **Use of Model Selection to Determine Intervals of Step Functions**

842 Variant takeover times,  $\theta = (\theta_1, \theta_2)$ , and start times of social-distancing periods,  $\tau =$   
843  $(\sigma, \tau_1, \dots, \tau_n)$ , were inferred from data; however, changes of the associated time-dependent step  
844 functions,  $Y_\theta(t)$ ,  $P_\tau(t)$ , and  $\Lambda_\tau(t)$ , were introduced only when an increase in model complexity  
845 was deemed to be justified. Each decision to introduce variant takeover or start of a new social-  
846 distancing period (beyond the initial period) was made using a model-selection procedure, which  
847 is described below. It should be noted that  $y_1$  and  $y_2$  are parameters of  $Y_\theta(t)$ ,  $p_0, p_1, \dots, p_n$  are  
848 parameters of  $P_\tau(t)$ , and  $\lambda_0, \lambda_1, \dots, \lambda_n$  are parameters of  $\Lambda_\tau(t)$ . These parameters determine the  
849 values of the step functions over different periods. For example, for  $n \geq 1$ ,  $p_1$  is the value of  
850  $P_\tau(t)$  and  $\lambda_1$  is the value of  $\Lambda_\tau(t)$  for the period  $t \in [\tau_1, \tau_2)$ . Similarly,  $y_1$  is the value of  $Y_\theta(t)$   
851 for the period  $t \in [\theta_1, \theta_2)$ , and  $y_2$  is the value of  $Y_\theta(t)$  for the period  $t \in [\theta_2, t_{\text{final}})$ , where  $t_{\text{final}}$   
852 corresponds to the date of inference (October 31, 2021).

853 We started with a setting of  $n = 7$  for each MSA of interest (i.e., 8 total social-distancing  
854 stages). To determine if  $n$  could be reduced, we conducted so-called “parsimony checks”. In a  
855 parsimony check, 100 MLE curves, each constituting a fit to the data, were generated via  
856 optimization jobs (started at 100 randomly selected locations in parameter space). The total  
857 number of social-distancing stages  $n + 1$  in the model was 1 less than for the current proposed  
858 best fit. Each of the 100 fits was then visually inspected to check whether or not the following  
859 criteria held: 1) the quality of fit is acceptable (i.e., comparable to what is obtained with the  
860 current proposed best fit); 2) Alpha and Delta surges (identified by sequencing data) are  
861 explained at least partly by increased transmissibility; 3) social-distancing setpoint parameter  
862 values are feasible; 4) social-distancing changes proximal to an Alpha or Delta surge (if any)  
863 occur only after an increase in transmissibility. If one or more of these conditions was not  
864 satisfied, we accepted the proposed best fit as the most parsimonious fit to the data. If all of the

865 conditions held, we had a new proposed best fit, and the parsimony check was repeated for a  
866 model with one less social-distancing stage.

## 867 **Simulations**

868 After specification of parameter values (Tables 1–3), we used the SciPy  
869 (<https://www.scipy.org>) interface to LSODA [11] to numerically integrate the system of coupled  
870 ODEs consisting of the 40 ODEs of the compartmental model and the 1 ODE of the  
871 measurement model (Appendix Equations 1–39). The initial condition was defined by settings  
872 for  $t_0$ ,  $I_0$ , and  $S_0$  (Tables 1–3). Integration combined with use of Appendix Equation 40 yielded a  
873 prediction of the expected number of new cases detected for each 1-d surveillance period of  
874 interest in the past or future:  $I(t_i, t_{i+1})$ , where  $t_i$  corresponds to midnight on the  $i$ th day after  
875 January 21, 2020. To account for randomness in case detection and reporting, we replaced  
876  $I(t_i, t_{i+1})$  with  $X_i \sim \text{NB}(r, q_i)$ , where  $q_i$  is given by Appendix Equation 43.

## 877 **Appendix References**

878 [1] Covid Act Now. US COVID risk and vaccine tracker. 2021 [cited 2021 Sep 29]

879 <https://covidactnow.org/>

880 [2] Lin YT, Neumann J, Miller EF, Posner RG, Mallela A, Safta C, Ray J, Thakur G,

881 Chinthavali S, Hlavacek WS. Daily forecasting of regional epidemics of Coronavirus

882 Disease with Bayesian uncertainty quantification, United States. *Emerg Inf Dis.*

883 2021;27:767–78. <https://doi.org/10.3201/eid2703.203364>

884 [3] Korodi M, Rákosi K, Jenei Z, Hudák G, Horváth I, Kákes M, et al. Longitudinal

885 determination of mRNA-vaccination induced strongly binding SARS-CoV-2 IgG

886 antibodies in a cohort of healthcare workers with and without prior exposure to the novel

- 887 coronavirus. *Vaccine*. 2022;40:37: 5445–5451.
- 888 <https://doi.org/10.1016/j.vaccine.2022.07.040>
- 889 [4] Thompson MG, Burgess JL, Naleway AL, Tyner HL, Yoon SK, Meece J, et al. Interim  
890 estimates of vaccine effectiveness of BNT162b2 and mRNA-1273 COVID-19 vaccines  
891 in preventing SARS-CoV-2 infection among health care personnel, first responders, and  
892 other essential and frontline workers—eight U.S. locations, December 2020–March 2021.  
893 *MMWR Morb Mortal Wkly Rep*. 2021;70:495–500.  
894 <http://dx.doi.org/10.15585/mmwr.mm7013e3>
- 895 [5] Puranik A, Lenehan PJ, Silvert E, Niesen MJM, Corchado-Garcia J, O’Horo JC, et al.  
896 Comparison of two highly-effective mRNA vaccines for COVID-19 during periods of  
897 Alpha and Delta variant prevalence. [cited 2021 Oct 8]  
898 <https://www.medrxiv.org/content/10.1101/2021.08.06.21261707v3>
- 899 [6] Tang P, Hasan MR, Chemaitelly H, Yassine HM, Benslimane FM, Al Khatib HA, et al.  
900 BNT162b2 and mRNA-1273 COVID-19 vaccine effectiveness against the SARS-CoV-2  
901 Delta variant in Qatar. *Nat Med*. 2021;27:2136–43.  
902 <https://www.nature.com/articles/s41591-021-01583-4>
- 903 [7] Lopez Bernal J, Andrews N, Gower C, Gallagher E, Simmons R, Thelwall S, et al.  
904 Effectiveness of Covid-19 Vaccines against the B.1.617.2 (Delta) variant. *N Engl J Med*.  
905 2021;385:585–94. <https://doi.org/10.1056/NEJMoa2108891>
- 906 [8] Andrieu C, Thoms J. A tutorial on adaptive MCMC. *Stat Comput*. 2008;18:343–73.  
907 <https://doi.org/10.1007/s11222-008-9110-y>
- 908 [9] Neumann J, Lin YT, Mallela A, Miller EF, Colvin J, Duprat AT, Chen Y, Hlavacek WS,  
909 Posner RG. Implementation of a practical Markov chain Monte Carlo sampling algorithm

910 in PyBioNetFit. *Bioinformatics*. 2022;38:1770–2.

911 <https://doi.org/10.1093/bioinformatics/btac004>

912 [10] Burnham KP, Anderson DR. Multimodal inference: understanding AIC and BIC

913 in model selection. *Sociol Methods Res*. 2016;33:261–304.

914 <https://doi.org/10.1177/0049124104268644>

915 [11] Hindmarsh AC. ODEPACK, a systematized collection of ODE solvers. In

916 Stepleman RS, editor. *Scientific computing: applications of mathematics and computing*

917 to the physical sciences. Amsterdam: North-Holland Publishing Company; 1983. p. 55–

918 64.

919

**Appendix Table 1.** State variables of the compartmental model

| State variable<br>(population)  | Description                                                                                                                                                                                                |
|---------------------------------|------------------------------------------------------------------------------------------------------------------------------------------------------------------------------------------------------------|
| $S_M$                           | Population of susceptible unvaccinated persons who are mixing (i.e., not practicing social distancing)                                                                                                     |
| $S_P$                           | Population of susceptible unvaccinated persons who are practicing social distancing                                                                                                                        |
| $S_{V,1}$                       | Population of vaccinated unexposed persons who developed an immune response to vaccination that does not protect against productive infection by ancestral strains or the Alpha and Delta variants         |
| $S_{V,2}$                       | Population of vaccinated unexposed persons who developed an immune response to vaccination that protects against productive infection by ancestral strains but not the Alpha or Delta variants             |
| $S_{V,3}$                       | Population of vaccinated unexposed persons who developed an immune response to vaccination that protects against productive infection by ancestral strains and the Alpha variant but not the Delta variant |
| $S_{V,4}$                       | Population of vaccinated unexposed persons who developed an immune response to vaccination that protects against productive infection by ancestral strains and the Alpha and Delta variants                |
| $V_i$ ( $i = 1, \dots, 6$ )     | Population of vaccinated persons in the $i$ th stage of immune response to vaccination                                                                                                                     |
| $E_{i,M}$ ( $i = 1, \dots, 5$ ) | Population of exposed unvaccinated persons in the $i$ th stage of the incubation period of infection and who are mixing                                                                                    |
| $E_{i,P}$ ( $i = 1, \dots, 5$ ) | Population of exposed unvaccinated persons in the $i$ th stage of the incubation period of infection and who are practicing social distancing                                                              |
| $E_{i,Q}$ ( $i = 2, \dots, 5$ ) | Population of exposed unvaccinated persons in the $i$ th stage of the incubation period of infection and who are quarantined                                                                               |
| $E_V$                           | Population of vaccinated persons in the incubation period of a productive infection (i.e., an infection that can be transmitted to others)                                                                 |

|       |                                                                                                                                                                      |
|-------|----------------------------------------------------------------------------------------------------------------------------------------------------------------------|
| $A_M$ | Population of asymptomatic unvaccinated persons who are in the immune clearance phase of infection and who are mixing                                                |
| $A_P$ | Population of asymptomatic unvaccinated persons who are in the immune clearance phase of infection and who are practicing social distancing                          |
| $A_Q$ | Population of asymptomatic unvaccinated persons who are in the immune clearance phase of infection and who are quarantined                                           |
| $A_V$ | Population of asymptomatic vaccinated persons who are in the immune clearance phase of a productive infection (i.e., an infection that can be transmitted to others) |
| $I_M$ | Population of infectious, symptomatic, and unvaccinated persons with mild disease who are mixing                                                                     |
| $I_P$ | Population of infectious, symptomatic, non-vaccinated, and infectious persons with mild disease who are practicing social distancing                                 |
| $I_Q$ | Population of infectious, symptomatic, and unvaccinated persons with mild disease who are quarantined                                                                |
| $I_V$ | Population of infectious, symptomatic, and vaccinated persons with mild disease                                                                                      |
| $R_U$ | Population of recovered unvaccinated persons                                                                                                                         |
| $R_V$ | Population of recovered vaccinated persons                                                                                                                           |
| $H_U$ | Population of unvaccinated persons with severe disease who are hospitalized or isolated at home                                                                      |
| $H_V$ | Population of vaccinated persons with severe disease who are hospitalized or isolated at home                                                                        |
| $D$   | Population of deceased persons                                                                                                                                       |

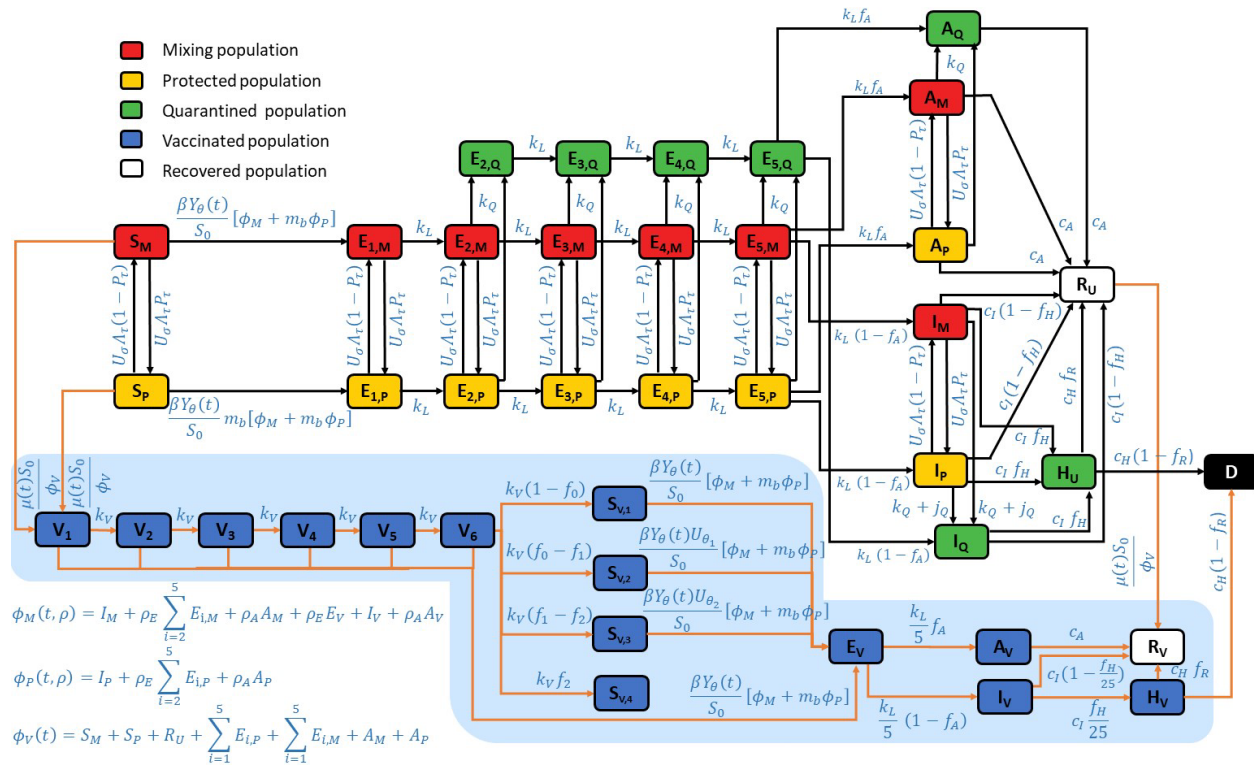

922

923 **Appendix Figure 1.** Expanded illustration of the new compartmental model. In the extended  
 924 model, vaccination was considered by allowing susceptible and recovered persons to transition  
 925 into a vaccinated compartment, either  $V_1$  and  $R_V$ . Susceptible (recovered) persons who have  
 926 completed vaccination move into the  $V_1$  ( $R_V$ ) compartment. The susceptible persons who move  
 927 into  $V_1$  are drawn from  $S_M$  (populated by susceptible persons who are mixing and unprotected by  
 928 social distancing) and from  $S_P$  (populated by susceptible persons who are protected by social  
 929 distancing). After susceptible persons enter  $V_1$ , they can move through a series of additional  
 930 compartments ( $V_2$  through  $V_6$ ), which are included to capture the time needed for immunity to  
 931 develop after completion of vaccination. We estimate that the time needed to acquire immunity  
 932 after vaccination is approximately three weeks based on longitudinal studies of anti-spike protein  
 933 IgG levels [3]. Persons who exit the  $V_6$  compartment without becoming infected enter one of the  
 934 following compartments:  $S_{V,1}$ ,  $S_{V,2}$ ,  $S_{V,3}$ , or  $S_{V,4}$ . Persons in  $S_{V,1}$  are taken to remain susceptible



935 to productive infection by all SARS-CoV-2 strains of interest (Alpha, Delta, and ancestral  
936 strains). Persons in  $S_{V,2}$  are taken to be susceptible to SARS-CoV-2 Alpha and Delta variants.  
937 Persons in  $S_{V,3}$  are taken to be susceptible to Delta. Persons in  $S_{V,4}$  are taken to be protected  
938 against all strains of interest. Infection of persons in  $S_{V,3}$  is only allowed if Delta is present, i.e.,  
939 at times  $t > \theta_2$ . Infection of persons in  $S_{V,2}$  is only allowed if Alpha or Delta is present, i.e., at  
940 times  $t > \theta_1$ . Vaccinated persons in compartments  $V_1$  through  $V_6$  and compartment  $S_{V,1}$  are  
941 allowed to become infected at any time, at which point they transition to compartment  $E_V$ ,  
942 consisting of vaccinated persons who were exposed before development of vaccine-induced  
943 immunity. Persons in compartment  $S_{V,2}$  are allowed to become infected if  $t \geq \theta_1$ . Similarly,  
944 persons in compartment  $S_{V,3}$  are allowed to become infected if  $t \geq \theta_2$ . Possible outcomes for  
945 persons in  $E_V$  are taken to be the same as those for unvaccinated exposed persons; however, the  
946 incubation period is taken to be distinct. Persons in  $E_V$  can experience asymptomatic disease  
947 (upon entering  $A_V$ ) or they can become symptomatic (upon entering  $I_V$ ). Persons in  $A_V$   
948 eventually recover, entering compartment  $R_V$ . Persons in  $I_V$  can progress to severe disease (upon  
949 entering  $H_V$ ) or recover (upon entering  $R_V$ ). Persons in  $H_V$  either recover (moving into  $R_V$ ) or die  
950 (moving into  $D$ ). Persons who have recovered from infection, in the  $R_U$  compartment, move  
951 directly into the  $R_V$  compartment upon vaccination. Persons in the  $R_U$  and  $R_V$  compartments are  
952 taken to have full immunity. The vaccination rate at which susceptible and recovered persons  
953 move into vaccinated compartments is updated daily for consistency with the empirical overall  
954 rate of vaccination, which we extract daily from the COVID Act Now Data API [1]. The relative  
955 values of the vaccination rate are set such that each person eligible for vaccination has the same  
956 probability of being vaccinated. All unvaccinated persons are taken to be eligible for vaccination  
957 except symptomatic persons (in compartments  $I_M$  and  $I_P$ ), persons who are hospitalized or

958 severely ill at home (in compartment  $H$ ), quarantined persons (in the various compartments  
959 labeled with a Q subscript), and deceased persons (in compartment  $D$ ). It should be noted that  
960 asymptomatic, non-quarantined persons (in compartments  $A_M$  and  $A_P$ ) and presymptomatic, non-  
961 quarantined persons (in the  $E$  compartments) are taken to be eligible (and to influence the  
962 vaccination rate constants) but, as a simplification, these persons are not explicitly tracked as  
963 vaccinated or unvaccinated because each of these persons will eventually enter either the  $D$   
964 compartment or the  $R_U$  compartment, at which point they will have immunity. In the model, the  
965 effects of SARS-CoV-2 variants are captured by a time-dependent dimensionless multiplier  
966  $Y_\theta(t)$  of the rate constant  $\beta$ . This rate constant, which appears in Appendix Equations 1–4, 18–  
967 22, and 24, determines the rate of disease transmission within the subpopulation unprotected by  
968 social-distancing behaviors when  $Y_\theta(t) = 1$ . We take  $Y_\theta(t) = 1$  for times  $t < \theta_1$ , i.e., for the  
969 initial period of the COVID-19 pandemic in the US that we take to have started on January 21,  
970 2020. We take  $Y_\theta(t)$  to have the form of a step function with distinct values greater than 1 for  
971 periods starting at  $t = \theta_1$  and  $\theta_{k+1} > \theta_k$  for  $k = 1, \dots, m$ . Thus, the model allows for  $m$  distinct  
972 periods of variant strain dominance delimited by a set of start times  $\theta = \{\theta_1, \dots, \theta_m\}$ . We  
973 considered  $m = 2$ . We assume that variants differ only in transmissibility.

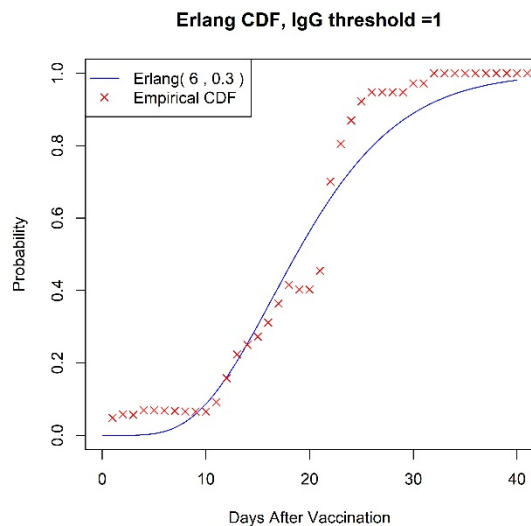

974

975 **Appendix Figure 2.** Comparison of an Erlang cumulative distribution function with shape  
976 parameter  $n_V = 6$  and rate parameter  $k_V = 0.3 \text{ d}^{-1}$  and the empirical cumulative distribution of  
977 waiting times ( $\tilde{t}_V$  values) observed in the longitudinal study of Korodi et al. [3]. The waiting  
978 time  $\tilde{t}_V$  is the time between vaccination of a previously uninfected person and detection of  
979 vaccine-induced SARS-CoV-2-specific IgG antibodies.
